1 **Running Head:** PRX01, PRX44 and PRX73 are peroxidases active in root hair growth

2

3 **Authors for Correspondence:**

4 *José M. Estevez*

5 Fundación Instituto Leloir, Av. Patricias Argentinas 435, Buenos Aires C1405BWE, Argentina. TE: 54-  
6 115238-7500 EXT. 3206

7 Centro de Biotecnología Vegetal, Facultad de Ciencias de la Vida, Universidad Andrés Bello and  
8 Millennium Institute for Integrative Biology (iBio), Santiago CP 8370146, Chile.

9 Email: [jestevez@leloir.org.ar](mailto:jestevez@leloir.org.ar) / [jose.estevez@unab.cl](mailto:jose.estevez@unab.cl)

10

11

12 **Research area most appropriate for paper:** Plant Biology

13

14

15 Text Word count: 3,667

16 Figures 1-4

17 Table 1

18 Experimental procedures

19 References: 55

20

## RESEARCH REPORT

### 21 **Class III peroxidases PRX01, PRX44, and PRX73 potentially target extensins during root hair** 22 **growth in *Arabidopsis thaliana***

23  
24 Eliana Marzol<sup>1,#</sup>, Cecilia Borassi<sup>1,#</sup>, Philippe Ranocha<sup>2</sup>, Ariel. A. Aptekman<sup>3,4</sup>, Mauro Bringas<sup>5</sup>, Janice  
25 Pennington<sup>6</sup>, Julio Paez-Valencia<sup>6</sup>, Javier Martínez Pacheco<sup>1</sup>, Diana Rosa Rodríguez García<sup>1</sup>,  
26 Yossmayer del Carmen Rondón Guerrero<sup>1</sup>, Mariana Carignani<sup>1</sup>, Silvina Mangano<sup>1</sup>, Margaret  
27 Fleming<sup>7</sup>, John W. Mishler-Elmore<sup>8</sup>, Francisca Blanco-Herrera<sup>9,10</sup>, Patricia Bedinger<sup>7</sup>, Christophe  
28 Dunand<sup>2</sup>, Luciana Capece<sup>5</sup>, Alejandro D. Nadra<sup>3,4</sup>, Michael Held<sup>8</sup>, Marisa Otegui<sup>6,11</sup> & José M.  
29 Estevez<sup>1,9,†</sup>  
30

31 <sup>1</sup>Fundación Instituto Leloir and IIBBA-CONICET. Av. Patricias Argentinas 435, Buenos Aires  
32 C1405BWE, Argentina.

33 <sup>2</sup>Université de Toulouse, UPS, UMR 5546, Laboratoire de Recherche en Sciences Végétales, F-31326  
34 CNRS, UMR 5546 Castanet-Tolosan, France.

35 <sup>3</sup>Departamento de Fisiología, Biología Molecular y Celular, Instituto de Biociencias, Biotecnología y  
36 Biología Traslacional (iB3). Facultad de Ciencias Exactas y Naturales, Universidad de Buenos Aires,  
37 Ciudad Universitaria, Buenos Aires C1428EGA, Argentina.

38 <sup>4</sup>Departamento de Química Biológica, Facultad de Ciencias Exactas y Naturales, Universidad de  
39 Buenos Aires (IQUIBICEN-CONICET), Ciudad Universitaria, Buenos Aires C1428EGA, Argentina.

40 <sup>5</sup>Departamento de Química Inorgánica, Analítica y Química Física, Facultad de Ciencias Exactas y  
41 Naturales, Universidad de Buenos Aires (INQUIMAE-CONICET), Buenos Aires, CP. C1428EGA,  
42 Argentina.

43 <sup>6</sup>Laboratory of Cell and Molecular Biology, University of Wisconsin, Madison, WI, USA.

44 <sup>7</sup>Department of Biology, Colorado State University, Fort Collins, Colorado 80523-1878, USA.

45 <sup>8</sup>Department of Chemistry and Biochemistry, Ohio University, Athens, OH 45701, USA.

46 <sup>9</sup>Centro de Biotecnología Vegetal, Facultad de Ciencias de la Vida, Universidad Andrés Bello and  
47 Millennium Institute for Integrative Biology (iBio), Santiago, Chile.

48 <sup>10</sup>Center of Applied Ecology and Sustainability (CAPES), Chile.

49 <sup>11</sup>Departments of Botany and Genetics, University of Wisconsin, Madison, WI, USA.

50

51 # co-first authors

52 † Correspondence should be addressed. Email: [jestevez@leloir.org.ar](mailto:jestevez@leloir.org.ar) / [jose.estevez@unab.cl](mailto:jose.estevez@unab.cl) (J.M.E).

53

54 Key words: Arabidopsis, cell walls, extensins, root hairs, ROS, class-III peroxidases.

55

56 Word count: 3,656

57 **Abstract**

58 • Root hair cells are important sensors of soil conditions. Expanding several hundred times their  
59 original size, root hairs grow towards and absorb water-soluble nutrients. This rapid growth is  
60 oscillatory and is mediated by continuous remodelling of the cell wall. Root hair cell walls contain  
61 polysaccharides and hydroxyproline-rich glycoproteins including extensins (EXTs).

62  
63 • Class-III peroxidases (PRXs) are secreted into the apoplastic space and are thought to trigger  
64 either cell wall loosening, mediated by oxygen radical species, or polymerization of cell wall  
65 components, including the Tyr-mediated assembly of EXT networks (EXT-PRXs). The precise role  
66 of these EXT-PRXs is unknown.

67  
68 • Using genetic, biochemical, and modeling approaches, we identified and characterized three root  
69 hair-specific putative EXT-PRXs, PRX01, PRX44, and PRX73. The triple mutant *prx01,44,73* and the  
70 PRX44 and PRX73 overexpressors had opposite phenotypes with respect to root hair growth,  
71 peroxidase activity and ROS production with a clear impact on cell wall thickness.

72  
73 • Modeling and docking calculations suggested that these three putative EXT-PRXs may interact  
74 with non-*O*-glycosylated sections of EXT peptides that reduce the Tyr-to-Tyr intra-chain distances  
75 in EXT aggregates and thereby may enhance Tyr crosslinking. These results suggest that these  
76 three putative EXT-PRXs control cell wall properties during the polar expansion of root hair cells.

77

78 Word count: 200

## 79 Introduction

80 Primary cell walls composed by a diverse network of polysaccharides and structural glycoproteins,  
81 regulate cell elongation, which is crucial for several plant growth and developmental processes.  
82 Extensins (EXTs) belong to hydroxyproline (Hyp)-rich glycoprotein (HRGP) superfamily and broadly  
83 include related glycoproteins such as proline-rich proteins (PRPs) and leucine-rich repeat extensins  
84 (LRXs) with multiple Ser-(Pro)<sub>3-5</sub> repeats that may be *O*-glycosylated and contain Tyr (Y)-based  
85 motifs (Marzol et al. 2018). EXTs require several modifications before they become functional  
86 (Marzol et al. 2018). After being hydroxylated and *O*-glycosylated in the secretory pathway, the  
87 secreted *O*-glycosylated EXTs are crosslinked and insolubilized in the plant cell wall by the activity of  
88 secreted class-III peroxidases (PRXs) on the Tyr-based motifs (Lamport et al., 2011; Marzol et al.  
89 2018). PRXs are thought to facilitate both intra and inter-molecular covalent Tyr–Tyr crosslinks in  
90 EXT networks, possibly through the assembly of triple helices (Velasquez et al. 2015) by generating  
91 *isodityrosine* units (IDT) and *pulcherosine*, or *di-isodityrosine* (Di-IDT), respectively (Brady et al.,  
92 1996; 1998; Held et al. 2004). However, the underlying molecular mechanisms of EXT crosslinking  
93 and assembly have not been determined. The presence of Tyr-mediated crosslinking in EXT and  
94 related glycoproteins allow them to form a dendritic glycoprotein network in the cell wall. This  
95 network affects *de novo* cell wall formation during embryo development (Cannon *et al.*, 2008) and  
96 in polar cell expansion processes in root hairs (Baumberger 2001, 2003; Ringli 2010; Velasquez et al.  
97 2011; 2012; 2015a,b) and pollen tubes (Ringli et al. 2017; Sede et al. 2018; Wang et al. 2018).

98  
99 Apoplastic class-III PRXs are heme-iron-dependent proteins, members of a large multigenic family in  
100 land plants, with 73 members in *Arabidopsis thaliana* (Passardi et al. 2004; Weng and Chapple,  
101 2010). These PRXs catalyze several different classes of reactions. PRX activities coupled to *apo*ROS  
102 molecules (*apo*H<sub>2</sub>O<sub>2</sub>) directly affect the degree of cell wall crosslinking (Dunand et al. 2007) by  
103 oxidizing cell wall compounds and leading to stiffening of the cell wall through a peroxidative cycle  
104 (PC) (Lamport et al. 2011). By contrast, *apo*ROS coupled to PRX activity enhances non-enzymatic cell  
105 wall-loosening by producing oxygen radical species (e.g., <sup>•</sup>OH) and promoting growth in the  
106 hydroxylic cycle (HC). It is unclear how these opposite effects on cell wall polymers are coordinated  
107 during plant growth (Passardi et al. 2004, Cosio & Dunand 2009). Finally, PRXs also contribute to the  
108 superoxide radical (O<sub>2</sub><sup>•-</sup>) pool by oxidizing singlet oxygen in the oxidative cycle (OC), thereby  
109 affecting *apo*H<sub>2</sub>O<sub>2</sub> levels. Thus, several PRXs are involved in the oxidative polymerization of  
110 monolignols in the apoplast of the lignifying cells in xylem (e.g. PRX017; Cosio et al 2017), in the root  
111 endodermis (e.g. PRX64; Lee et al. 2013; Ropollo et al. 2011), and in petal detachment (Lee et al  
112 2018). In addition, PRXs are able to polymerize other components of the plant cell wall such as  
113 suberin, pectins, and EXTs (Schnabelrauch *et al.*, 1996; Bernards et al., 1999; Jackson et al., 2001;  
114 Francoz et al. 2019). Although several candidates of PRXs have been associated specifically with EXT-  
115 crosslinking (EXT-PRXs) by *in vitro* studies (Schnabelrauch et al., 1996; Wojtaszek et al., 1997;  
116 Jackson et al., 2001; Price et al., 2003; Pereira et al. 2011; Dong et al., 2015) or immunolabelling

117 extension characterization (Jacobowitz et al. 2019), the *in vivo* characterization and mode of action  
118 of these EXT-PRXs remain largely unknown. In this work, we used a combination of reverse genetics,  
119 molecular and cell biology, computational molecular modeling, and biochemistry to identify three  
120 apoplastic PRXs, PRX01, PRX44 and PRX73, as key enzymes possibly involved in Tyr-crosslinking of  
121 cell wall EXTs in growing root hair cells. In addition, we propose a model in which *O*-glycosylation  
122 levels on the triple helixes of EXTs regulate the degree of Tyr-crosslinking affecting the expansion  
123 properties of cell walls as suggested before (Velasquez et al. 2015a). Our results open the way for  
124 the discovery of similar interactions during root hair development and in response to the  
125 environmental changes, such as fluctuating nutrient availability in the soil.

126

## 127 **Results and Discussion**

128 In this work, we have chosen to analyze root hair cells because they are an excellent model for  
129 tracking cell elongation and identifying PRXs involved in EXT assembly. In previous work, the  
130 phenotypes of mutants for PRX01, PRX44 and PRX73 suggested that these PRXs are involved in root  
131 hair growth and ROS homeostasis, although their mechanisms of action remained to be  
132 characterized (Mangano et al. 2017). All three PRXs are under the transcriptional regulation of the  
133 root hair specific transcription factor RSL4 (Yi et al. 2010; Mangano et al. 2017). As expected, these  
134 three PRXs are also highly co-expressed with other root hair-specific genes encoding cell wall EXTs  
135 (e.g., EXT6-7, EXT12-14, and EXT18) and EXT-related glycoproteins (e.g. LRX1 and LRX2), which  
136 functions in cell expansion (Ringli 2010; Velasquez et al. 2011; Velasquez et al. 2015b) (**Figure S1**).  
137 Based on this evidence, we hypothesized that these three PRXs might be EXT-PRXs and catalyze Tyr-  
138 crosslinks to assemble EXTs in root hair cell walls.

139

140 To confirm that PRX01, PRX44, and PRX73 are expressed specifically in root hairs, we made  
141 transcriptional reporters harboring GFP-tagged fusions of the promoter regions of their genes. In  
142 agreement with the *in silico* database (Mangano et al. 2017 and **Figure S1**), all three genes were  
143 strongly expressed in root hair cells during cell elongation (**Figure 1A**). Single and double mutants for  
144 these three PRXs showed almost normal root hair growth (Mangano et al. 2017), suggesting a high  
145 degree of functional redundancy. By contrast, a triple null mutant, *prx01,44,73*, showed much  
146 shorter root hair cells (**Figure 1B**) than what was previously reported for each of the individual *prx*  
147 mutants (Mangano et al. 2017). We also obtained two independent lines overexpressing each of the  
148 PRXs fused to GFP and under the control of a strong *35SCaMV* promoter (PRX<sup>OE</sup>). Unlike the  
149 *prx01,44,73* mutant, the lines overexpressing PRX44 and PRX73 had significantly longer root hairs  
150 than the Wt Col-0 control (**Figure 2A–B**). The root hairs of the PRX01<sup>OE</sup> lines, however, were similar  
151 to those of Wt Col-0 (**Figure 2A–B**). We reasoned that the lack of enhanced root hair expansion in  
152 the PRX01<sup>OE</sup> lines could be due to reduced levels of overexpression compared to the PRX44<sup>OE</sup> and  
153 PRX73<sup>OE</sup> lines. However, based on the GFP signals in intact roots (**Figure 2C**) and immunoblot  
154 analysis of protein extracts with anti-GFP antibodies (**Figure 2D**), we established that PRX01-GFP and

155 PRX44-GFP are strongly expressed, whereas PRX73-GFP showed more moderate expression.  
156 Furthermore, the three PRX-GFP-fusion proteins were detected at the expected molecular weights  
157 in an immunoblot (**Figure 2D**), indicating that the tagged proteins are stable. Together, these results  
158 highlight the partially redundant but not identical roles of PRX01, PRX44, and PRX73 as positive  
159 regulators of polar growth. This is in agreement with the negative effect of SHAM, which blocks the  
160 activity of most peroxidases, on root hair growth (Mangano et al. 2017).

161  
162 To confirm that our mutant and overexpressing lines had the expected changes in peroxidase  
163 activity, we measured *in vitro* total peroxidase activity using a guaiacol oxidation-based assay. The  
164 *prx01,44,73* roots showed reduced peroxidase activity (close to 50% reduction) (**Figure 1C**), whereas  
165 there was a 40–50% increase in PRX73<sup>OE</sup> and an approximately 20% increase in PRX44<sup>OE</sup> (**Figure 2E**).  
166 Consistent with our root hair growth analysis (**Figure 2A**), PRX01<sup>OE</sup> showed normal peroxidase  
167 activity (**Figure 2E**). These three PRXs might consume ROS, most probably H<sub>2</sub>O<sub>2</sub>, for their catalytic  
168 functions in the cell wall/apoplast. Therefore, we measured cytoplasmic ROS (<sub>cyt</sub>ROS) levels by  
169 oxidation of H<sub>2</sub>DCF-DA and apoplastic ROS (<sub>apo</sub>ROS) levels with the Amplex Ultra Red (AUR) probe in  
170 root hair tips. The *prx01,44,73* root hair tips showed lower levels of <sub>cyt</sub>ROS (**Figure 1D**) but increased  
171 <sub>apo</sub>ROS accumulation (**Figure 1E**) compared to Wt Col-0. The <sub>apo</sub>ROS levels were similar in PRX01<sup>OE</sup>,  
172 and slightly lower in PRX44<sup>OE</sup>, and PRX73<sup>OE</sup> lines when compared to Wt Col-0 (**Figure 2F**). These  
173 results suggest that PRX01, PRX44, and PRX73 function as apoplastic regulators of ROS-linked root  
174 hair cell elongation.

175  
176 Next, to further analyze the ultrastructure of the cell wall in growing root hairs, we analyzed Wt Col,  
177 PRX44<sup>OE</sup>, and *prx01,44,73* triple mutant roots treated with or without SHAM by transmission  
178 electron microscopy (**Figure 3A**). Much found thinner cell walls at the root hair tips of PRX44<sup>OE</sup> (0.74  
179 ±0.24 μm for PRX44<sup>OE</sup>) and *prx01,44,73* (0.61 ±0.14 μm) when compared to Wt Col-0 plants (1.2  
180 ±0.3 μm for Wt) (**Figure 3B**). SHAM treatment caused a statistically significant increase in cell wall  
181 thickness in the PRX44<sup>OE</sup> and *prx01,44,73* root hairs (**Figure 3B**), but not in Wt Col-0. This result  
182 confirms the importance of peroxidase activity in cell wall structure and highlights that either  
183 depletion of PRX01,44,73 (triple mutant) or the overexpression of PRX44 results in an overall  
184 reduction in cell wall thickness in growing root hairs.

185  
186 Then, we designed an EXT reporter to track EXT secretion and PRX-mediated insolubilization in the  
187 cell walls during root hair cell elongation. The secreted EXT reporter carries a Tomato tag (SS-TOM-  
188 Long-EXT) that is fluorescent under the acidic pH (Shen et al. 2014) that is typical of plant cell walls  
189 and apoplastic spaces (Stoddard & Rolland 2018). A secreted Tomato tag (ss-TOM) was used as a  
190 control (**Figure S2A**). The EXT domain includes only two Tyr, which are at the C-terminus and  
191 separated by 10 amino acids (Stratford et al., 2001). Expression of the EXT reporter was first tested  
192 in onion (*Allium cepa*) cells, and then the reporter was stably expressed in Arabidopsis root hairs

193 **(Figure S2C-F)**. In both cases, plasmolysis was used to retract the plasma membrane from the cell  
194 surface to show that the EXT reporter was localized in the cell walls. Using immunoblot analysis, we  
195 detected the full-length EXT-Tomato fusion protein, with possible *O*-glycan modifications, running as  
196 higher molecular weight bands **(Figure S2B)**. Importantly, the EXT reporter did not interfere with the  
197 polar growth of root hairs **(Figure S2D)**, and, therefore, could be used to track changes in the *in situ*  
198 arrangement of cell wall EXTs. SS-TOM-Long-EXT is clearly insolubilized in the cell wall of growing  
199 root hairs **(Figure S2C)** but remains to be tested if these EXT reporter is mislocalized under an  
200 inhibited PRX environment (SHAM treated) or in *prx01,44,73* mutant background.

201  
202 We then assessed the level of crosslinking of EXT Tyr residues by measuring peptidyl-tyrosine (Tyr)  
203 and isodityrosine (IDT, dimerized Tyr) in EXT extracted from whole roots. We detected a significant  
204 increase in peptidyl-Tyr in the *prx01,44,73* triple mutant relative to Wt Col-0, and slightly higher  
205 levels of IDT in EXTs extracted from the PRX73<sup>OE</sup> line **(Table S1)**. By contrast, we identified strong  
206 downregulation of Tyr- and IDT-levels in the EXT under-*O*-glycosylation mutants *p4h5*, *sergt1-1*, and  
207 *sergt1-1 rra3* **(Table 1)**. PROLYL 4-HYDROXYLASE (P4H5), PEPTIDYL-SER GALACTOSYLTRANSFERASE  
208 (SERGT1), and REDUCE RESIDUAL ARABINOSE 3 (RRA3) are enzymes that modify EXT hydroxylation  
209 and *O*-glycosylation **(Table 1)**. These results are consistent with the notion that *O*-glycans strongly  
210 affect EXT Tyr crosslinking, as was previously suggested based on the drastically reduced root hair  
211 growth of the under-glycosylation mutants and *in vitro* crosslinking rates (Velasquez et al 2015a,b;  
212 Chen et al. 2015). We hypothesize that absent or low *O*-glycosylation of EXTs or an increase in PRX  
213 levels may trigger a reduction in the amount of peptidyl-Tyr and IDT in EXTs, with a putative  
214 concomitant increase in the amounts of higher-order Tyr crosslinks (trimers and tetramers), thus  
215 inhibiting root hair growth. Further research is needed to decipher the *in vivo* regulation of Tyr  
216 crosslinking of EXTs by PRXs in plant cells.

217  
218 A major limitation in our understanding of how EXTs function in plant cell walls is the lack of a  
219 realistic full-length EXT protein model. Previously, we generated preliminary versions of a short EXT  
220 triple-helix model (Velasquez et al. 2015a). To gain a more detailed understanding of how EXT  
221 molecules might operate in the plant cell wall, we used a coarse-grained molecular dynamics  
222 approach to build a larger model of a triple-helix EXT sequence that includes 10 conserved repeats  
223 (SPPPPYVYSSPPPPYSPSPKVVYK) with a total length of 750 amino acids (250 in each polypeptide  
224 chain) **(Figure S3A–B)**. Parameters for the *O*-glycosylated form of EXT were developed in this work,  
225 and we were able to simulate the EXT *O*-glycosylated system **(Figure S4)**. The EXT molecules were  
226 modeled in two different states: as a non-glycosylated trimeric helical conformation similar to  
227 animal collagen, as performed previously (Velasquez et al., 2015a), and in the fully *O*-glycosylated  
228 state. In addition, we generated molecular dynamics simulations restraining both ends of the  
229 polypeptide chains, to model a fully extended helix (consistent with an “indefinitely long-EXT”). We  
230 also generated simulations without that restriction, to evaluate the conformation that an isolated

231 10-repeat triple helix would adopt. The results obtained in these simulations indicate the  
232 importance of the triple-helix conformation in the overall stability of the protein and especially in  
233 the conservation of its fibril-like structure, in agreement with 10-repeat single helix simulations  
234 performed previously (Marzol et al. 2018). The total volume of the extended 10-repeat triple helix  
235 was measured in both glycosylation states (**Table S1**), differentiating EXT-protein + *O*-glycans and  
236 EXT-protein-only volumes for the fully *O*-glycosylated EXT state. We observed that the EXT-protein-  
237 only volume was significantly augmented by the presence of the oligosaccharide moieties, indicating  
238 that *O*-glycans increase the distance between peptide chains in the EXT triple helix. We also report  
239 the average diameters for those systems (**Table S1**), which are consistent with the diameters  
240 previously reported based on atomic force microscopy images (Cannon et al. 2008). Additionally, *O*-  
241 glycosylation contributes to an increase in the average distance between the side chains of tyrosine  
242 residues, decreasing the proportion of tyrosine side chains that are close enough to lead to  
243 crosslinked EXT chains (**Figure S3C**). Current experimental and modeling lines of evidence are in  
244 agreement with the proposed role of proline-hydroxylation and carbohydrate moieties in keeping  
245 the EXT molecule in an extended helical polyproline-II conformation state (Stafstrom & Staehelin  
246 1986; Owen et al., 2010; Ishiwata et al., 2014). This extended conformation might allow EXTs to  
247 interact properly with each other and with other components in the apoplast, including PRXs and  
248 pectins, to form a proper cell wall network (Nuñez et al., 2009; Valentin et al., 2010).

249  
250 To test if the three PRXs (PRX01, PRX44, and PRX73) we identified might be able to interact directly  
251 with single-chain EXTs, we performed homology modeling with GvEP1 (from *Vitis vinifera*), an EXT-  
252 PRX that is able to crosslink EXTs *in vitro* (Jackson et al., 2001; Pereira et al. 2011). As additional  
253 controls, we selected PRX64, which has been described as necessary for lignin polymerization in  
254 Casparian strips in Arabidopsis root endodermis (Lee et al. 2013), and PRX36, which is able to bind  
255 homogalacturonan pectin in the outer seed coat layer (Francoz et al. 2019). By *docking* analysis, we  
256 obtained interaction energies (Kcal/mol) for PRX01, PRX44, PRX73, EXT-PRX GvEP1, and  
257 PRX64/PRX36. We analyzed docking with four different short EXT peptides: a non-hydroxylated EXT  
258 peptide (SPPPYVY)<sub>3</sub>, a hydroxylated but not *O*-glycosylated EXT peptide [(S000YVY)<sub>3</sub>;  
259 O=hydroxyproline], an EXT peptide that was only arabinosylated [(S000YVY)<sub>3</sub>-A], and an arabino-  
260 galactosylated EXT peptide [(S000YVY)<sub>3</sub>-AG]. As mentioned earlier, it was previously shown that  
261 mutants carrying under-*O*-glycosylated EXTs have severe defects in root hair growth (Velasquez et  
262 al. 2011; Velasquez et al. 2015a). At least one of these mutants, *p4h5*, also has a modified cell wall  
263 structure in the root hair tip (Velasquez et al. 2015b). Our docking results for the different PRXs  
264 show consistent interaction energy differences that depend on the glycosylation state of the EXT  
265 peptide used in the analysis, being higher for non-*O*-glycosylated species (both as proline or  
266 hydroxyproline). In addition, *O*-glycosylated EXT variants docked in a rather dispersed way while  
267 non-*O*-glycosylated variants preferentially docked in a grooved area (**Figure 4A–C**). Furthermore,  
268 **Figure 4A** shows how a non-*O*-glycosylated peptide binds through a groove, leaving one Tyr docked



269 in a cavity open to the solvent and very close to the heme iron (5Å), with a second Tyr a few  
270 Angstroms away. This disposition and the distances between the tyrosines suggest that this could be  
271 an active site where Tyr crosslinking takes place.

272  
273 It is not possible to do a rigorous direct comparison of the interaction energies obtained with the  
274 different EXT species because of the different size and degree of freedom (depending on the *O*-  
275 glycosylation) among docking runs (**Figure 4B**). However, general trends can be observed in **Figure**  
276 **4C**. In general, we observed higher interaction energies (more negative values) for hydroxylated  
277 species, followed by non-hydroxylated, and then by *O*-glycosylated variants. When we compared  
278 interaction energies among different PRXs interacting with EXT substrates with the same degree of  
279 *O*-glycosylation, we observed that PRX73 displayed the highest interaction activity with the non-  
280 hydroxylated (Ser-Pro-Pro-Pro) species, followed by PRX01 and then PRX44. For the hydroxylated,  
281 non-*O*-glycosylated variant (Ser-Hyp-Hyp-Hyp), the order was PRX44>PRX73>PRX01. PRX44  
282 displayed the highest interaction energy with the *O*-glycosylated species. All together, these results  
283 are consistent with the constitutive root hair growth effect observed for PRX44<sup>OE</sup> and PRX73<sup>OE</sup> and  
284 with non-glycosylated EXT being the substrate of peroxidation. Overall, this possibly indicate that  
285 PRX44 and PRX73 might interact with EXT substrates and possibly catalyze Tyr-crosslinking in open  
286 regions of the EXT backbones with little or no *O*-glycosylation. This is in agreement with previous  
287 studies that suggested that high levels of *O*-glycosylation in certain EXT segments physically restrict  
288 EXT lateral alignments, possibly by acting as a branching point (Velasquez et al., 2015a). Overall, the  
289 results of our study show that PRX01, PRX44, and PRX73 might be able good candidates for the  
290 crosslink EXTs at Tyr-sites.

291  
292 To examine the evolution of PRX01, PRX44, and PRX73, we performed comprehensive phylogenetic  
293 analyses of Class-III peroxidases across diverse land plant lineages. Under low selective pressure to  
294 maintain substrate specificity, EXT-PRX activities might have evolved multiple times in parallel  
295 during land plant evolution through gene duplication followed by neofunctionalization or  
296 subfunctionalization. PRX01, PRX44, and PRX73 belong to three independent orthologous groups  
297 (**Figure S5**) and orthologs for each *A. thaliana* PRX have been detected in available Brassicaceae  
298 genomes and in various Angiosperm and Gymnosperm families, but not from Lycophytes and from  
299 non-vascular land plants. Thus, these three PRX sequences were the result of ancestral duplications  
300 before the divergence between Gymnosperms and Angiosperms but after the emergence of the  
301 Tracheophytes (**Figure S5**). Orthologs of the three PRX genes have only been detected in true root  
302 containing organisms and these three PRXs are expressed in roots and root hairs, as are most of  
303 their orthologous sequences (where expression data are available) (**Figure S6**). This strongly  
304 supports the hypothesis that the three independent orthogroups have conserved functions in roots.  
305 With the exception of PRX73, which belongs to a cluster containing the EXT-PRX from tomato  
306 (*Solanum lycopersicum*; LePRX38), the other two PRX sequences did not cluster with sequences

307 already described as putative EXT-PRXs, such as PRX09 and PRX40 (Jacobowitz et al. 2019). Indeed,  
308 the other known EXT-PRXs (identified mostly based on *in vitro* evidence) are not clustered together,  
309 but are widely distributed in the tree (**Figure S5**). This analysis suggests that plant EXT-PRXs might  
310 have evolved several times in parallel during Tracheophyte evolution.

311  
312 Based on the results shown in this work, we propose a working model in which PRX01, PRX44, and  
313 PRX73 (and possibly other PRXs) control root hair growth by channelling H<sub>2</sub>O<sub>2</sub> consumption and  
314 affecting the cell wall hardening process. In addition, high levels of ROS in the apical zone of the  
315 cytoplasm might activate many other processes also related to polar growth (**Figure S7**). By contrast,  
316 when apoplastic PRX protein levels are low, which is linked to reduced peroxidase activity (as in the  
317 triple mutant *prx01,44,73*), high levels of ROS (as H<sub>2</sub>O<sub>2</sub>) might accumulate in the apoplast, triggering  
318 through the oxidative cycle a cell wall loosening effect that affects growth homeostasis and inhibits  
319 expansion (**Figure S7**). Concomitantly, deficient PRX activity in the apoplast also triggers lower ROS  
320 levels in the cytoplasm of growing root hairs, decreasing root hair growth and cell wall thickness.  
321 Our results suggest that either lower or higher levels of apoplastic Class III PRXs in the root hair cell  
322 walls might affect the homeostasis of ROS and cell wall thickness with a clear effect on cell  
323 expansion. Still several aspects of this model proposed here remains to be tested.

324

## 325 **Conclusions**

326 Currently, several of the 73 apoplastic Class-III PRXs in *Arabidopsis thaliana* have no assigned  
327 biological function. In this work, we have characterized three related EXT-PRXs, PRX01, PRX44, and  
328 PRX73 that function in ROS homeostasis and possibly in EXT assembly during root hair growth.  
329 These PRXs might control Tyr crosslinking in EXTs and related glycoproteins and modify its secretion  
330 and assembly in the nascent tip cell walls. Using modeling and docking approaches, we were able to  
331 measure the interactions of these PRXs with single chain EXT substrates. All these lines of evidence  
332 indicate that PRX01, PRX44, and PRX73 are important enzymes that could be involved in EXT  
333 assembly during root hair growth. From an evolutionary perspective, all the putative EXT-PRXs  
334 (identified mostly based on *in vitro* evidence or immunolabeling) do not cluster together in the  
335 phylogenetic tree of Class-III PRXs, suggesting that plant-related EXT-PRXs might have evolved  
336 several times in parallel during Traqueophyte evolution. Interestingly, as a convergent evolutionary  
337 extracellular assembly, hydroxyproline-rich collagen Class-IV, similar to the green EXT lineage and  
338 related glycoproteins, is also crosslinked by the activity of a specific class of animal heme  
339 peroxidases (named peroxidasin or PXDN) to form insoluble extracellular networks (Vanacore et al.  
340 2009; Bhave et al. 2012). While the biophysical properties of collagen IV allow the correct  
341 development and function of multicellular tissues in all animal phyla (Brown et al. 2017), EXT  
342 assemblies also have key functions in several plant cell expansion and morphogenesis processes  
343 (Cannon *et al.*, 2008; Velasquez et al. 2015b; Marzol et al. 2018). This might imply that crosslinked  
344 extracellular matrices based on hydroxyproline-rich polymers (e.g., collagens and EXTs) have

345 evolved more than once during eukaryotic evolution, providing mechanical support to single and  
346 multiple cellular tissues. Further analyses are required to establish how these EXT-PRXs catalyze Tyr  
347 crosslinks on EXTs at the molecular level and how this assembly process is regulated during polar  
348 cell expansion.

## 349 **Experimental Procedures**

350

351 **Plant and growth conditions.** *Arabidopsis thaliana* Columbia-0 (Col-0) was used as the wild Class  
352 (Wt) genotype in all experiments. All mutants and transgenic lines tested are in this genetic  
353 background. Seedlings were germinated on agar plates in a Percival incubator at 22°C in a growth  
354 room with 16h light/8h dark cycles for 10 days at 140  $\mu\text{mol m}^{-2}\text{s}^{-1}$  light intensity. Plants were  
355 transferred to soil for growth under the same conditions. For identification of T-DNA knockout lines,  
356 genomic DNA was extracted from rosette leaves. Confirmation by PCR of a single and multiple T-  
357 DNA insertions in the target PRX genes were performed using an insertion-specific LBb1 or LBb1.3  
358 (for SALK lines) primer in addition to one gene-specific primer. To ensure gene disruptions, PCR was  
359 also run using two gene-specific primers, expecting bands corresponding to fragments larger than in  
360 WT. We isolated homozygous lines for PRX01 (AT1G05240, *prx01-2*, Salk\_103597), PRX44  
361 (AT4G26010, *prx44-2*, Salk\_057222) and PRX73 (AT5G67400, *prx73-3*, Salk\_009296).

362

363 **PRX::GFP and 35S::PRX-GFP lines.** Vectors based on the Gateway cloning technology (Invitrogen)  
364 were used for all manipulations. Constitutive expression of PRXs-GFP tagged lines were achieved in  
365 plant destination vector pMDC83. cDNA PRXs sequences were PCR-amplified with AttB  
366 recombination sites. PCR products were then recombined first in pDONOR207 and transferred into  
367 pGWB83. To generate transcriptional reporter, the PRXs promoter regions (2Kb) was amplified and  
368 recombined first in pDONOR207 and transferred into pMDC111.

369

370 **SS-TOM and SS-TOM-Long-EXT constructs.** The binary vector pART27, encoding tdTomato secreted  
371 with the secretory signal sequence from tomato polygalacturonase and expressed by the  
372 constitutive CaMV 35S promoter (pART-SS-TOM), was the kind gift of Dr. Jocelyn Rose, Cornell  
373 University. The entire reporter protein construct was excised from pART-SS-TOM by digesting with  
374 *NotI*. The resulting fragments were gel-purified with the QIAquick Gel Extraction Kit and ligated  
375 using T4 DNA Ligase (New England Biolabs) into dephosphorylated pBlueScript KS+ that had also  
376 been digested with *NotI* and gel-purified to make pBS-SS-TOM. The plasmid was confirmed by  
377 sequencing with primers 35S-FP (5'-CCTTCGCAAGACCCTTCCTC-3') and OCS-RP (5'-  
378 CGTGACAACAGAATTGAAAGC-3'). The sequence of the EXT domain from *SIPEX1* (NCBI accession  
379 AF159296) was synthesized and cloned by GenScript into pUC57 (pUC57-EXT). The plasmid pBS-SS-  
380 TOM-Long-EXT was made by digesting pUC57-EXT and pBS-SS-TOM with *NdeI* and *SgrAI*, followed by  
381 gel purification of the 2243 bp band from pUC57-EXT and the 5545 bp band from pBS-SS-TOM, and  
382 ligation of the two gel-purified fragments. The pBS-SS-TOM-Long-EXT plasmid was confirmed by  
383 sequencing with 35S-FP, OCS-RP, and tdt-seq-FP (5'- CCCGTTCAATTGCCTGGT-3'). Both pBS plasmids  
384 were also confirmed by digestion. The binary vector pART-SS-TOM-Long-EXT was made by gel  
385 purifying the *NotI* insert fragment from the pBS-SS-TOM-Long EXT plasmid and ligating it with pART-

386 SS-TOM backbone that had been digested with *NotI*, gel purified, and dephosphorylated. This  
387 plasmid was confirmed by sequencing with 35S-FP, OCS-RP, and tdt-seq-FP.

388  
389 **Root hair phenotype.** For quantitative analysis of root hair phenotypes in *PRX01,44,73* mutants,  
390 35S:PRX-GFP lines and Wt Col-0, 200 fully elongated root hairs were measured (n roots= 20-30) from  
391 seedlings grown on vertical plates for 10 days. Values are reported as the mean  $\pm$ SD using the Image  
392 J software. Measurements were made after 7 days. Images were captured with an Olympus SZX7  
393 Zoom microscope equipped with a Q-Colors digital camera.

394  
395 **Confocal imaging.** Root hairs were ratio imaged with the Zeiss LSM 710 laser scanning confocal  
396 microscope (Carl Zeiss) using a 40X oil-immersion, 1.2 numerical aperture. EGFP (473–505nm)  
397 emission was collected using a 458-nm primary dichroic mirror and the meta-detector of the  
398 microscope. Bright-field images were acquired simultaneously using the transmission detector of  
399 the microscope. Fluorescence intensity was measured in 7  $\mu$ m ROI (Region Of Interest) at the root  
400 hair apex. For cytoplasmic ROS measurements, samples were observed with a confocal  
401 microscope equipped with a 488-nm argon laser and BA510IF filter sets. A 10x objective was used,  
402 0.30 N.A., 4.7 laser intensity, 1.1 offset, 440 photomultiplier (PMT) (for highest ROS levels), 480 PMT  
403 (for ROS media), and gain 3. Images were taken scanning XZY with 2  $\mu$ m between focal planes.  
404 Images were analyzed using ImageJ. To measure  $_{\text{cyt}}$ ROS highest levels, a circular region of interest  
405 (ROI) ( $r = 2.5$ ) was chosen in the zone of the root hair with the highest intensities. To measure ROS  
406 mean, the total area of the root hair was taken. To measure apoplastic ROPS, stained root hair cells  
407 were imaged with a Zeiss LSM5 Pascal laser scanning confocal microscope. The fluorescence  
408 emission of oxidized AUR in the apoplast of root hair cells was observed between 585 and 610 nm  
409 using 543 nm argon laser excitation, 40X objective, N/A= 1.2. Quantification of the AUR probing  
410 fluorescence signal was restricted to apoplastic spaces at the root hair tip.

411  
412 **Peroxidase activity.** Soluble proteins were extracted from roots grown on agar plates in a Percival  
413 incubator at 22°C in a growth room for 10 days at 140  $\mu$ mol  $\text{m}^{-2}\text{s}^{-1}$  light intensity by grinding in  
414 20mM HEPES, pH 7.0, containing 1 mM EGTA, 10mM ascorbic acid, and PVP PolyclarAT (100mg  $\text{g}^{-1}$   
415 fresh material; Sigma, Buchs, Switzerland). The extract was centrifuged twice for 10 min at 10,000 g.  
416 Each extract was assayed for protein levels with the Bio-Rad assay (Bio-Rad). PRX activity was  
417 measured at 25°C by following the oxidation of 8 mM guaiacol (Fluka) at 470 nm in the presence of  
418 2 mM  $\text{H}_2\text{O}_2$  (Carlo Erba) in a phosphate buffer (200 mM, pH6.0). Values are the mean of three  
419 replicates  $\pm$  SD.

420  
421 **ROS measurements.** To measure cytoplasmic ROS ( $_{\text{cyt}}$ ROS) measurements in root hairs, seedlings  
422 were incubated in darkness on a slide for 10 min with 50  $\mu$ M 2',7'-dichlorodihydrofluorescein  
423 diacetate ( $\text{H}_2\text{DCF-DA}$ ) at room temperature. Samples were observed with a confocal microscope. To

424 quantify apoplastic ROS ( $_{apo}ROS$ ) levels in root hairs, levels of apoplastic  $H_2O_2$  were measured using a  
425 solution of Amplex™ UltraRed Reagent (AUR, Molecular Probes). Briefly, Arabidopsis seedlings were  
426 incubated with 50  $\mu M$  AUR for 20 min in dark conditions.

427  
428 **Phylogenetic analysis.** 73 class-III PRX protein sequences from *A. thaliana*, two putative lignin class-  
429 III PRXs from *Zinnia elegans* and 4 putative Extensin class-III PRXs from *Lupinus album*, *Lycopersicum*  
430 *esculentum*, *Phaseolus vulgaris* and *Vitis vinifera*, have been aligned with ClustalW and the tree  
431 constructed using the Neighbor-Joining method (Saitou and Nei, 1987). The analyses were  
432 conducted in MEGA7 (Kumar, 2016). All protein sequences are available using their ID number  
433 (<http://peroxibase.toulouse.inra.fr>) (Savelli et al., 2019).

434  
435 **Co-expression analysis network.** Co-expression networks for *RSL4* root hair genes were identified  
436 from PlaNet (<http://aranet.mpimp-golm.mpg.de>) and trimmed to facilitate readability (Mutwill et al.  
437 2011). Each co-expression of interest was confirmed independently using the expression angler tool  
438 from Botany Array Resource BAR ([http://bar.utoronto.ca/ntools/cgi-](http://bar.utoronto.ca/ntools/cgi-bin/ntools_expression_angler.cgi)  
439 [bin/ntools\\_expression\\_angler.cgi](http://bar.utoronto.ca/ntools/cgi-bin/ntools_expression_angler.cgi)) and ATTED-II (<http://atted.jp>). Only those genes that are  
440 connected with genes of interest are included.

441  
442 **Tyr-crosslinking analysis.** Alcohol-insoluble residues of root tissues obtained from *PRX01,44,73*  
443 mutants, Col-0 and 35S:PRX-GFP lines were hydrolyzed in 6 N HCl (aqueous) with 10 mM phenol (2  
444  $mg\ ml^{-1}$ ; 110 °C; 20 h). Hydrolysates were dried under a steady stream of nitrogen (gas) and then re-  
445 dissolved at 10  $mg\ ml^{-1}$  in water. The hydrolysates were fractionated by gel permeation  
446 chromatography on a polyhydroxyethyl A column (inner diameter, 9.4 x 200 mm, 10 nm pore size,  
447 Poly LC Inc., Columbia, MD) equilibrated in 50 mM formic acid and eluted isocratically at a flow rate  
448 of 0.8  $ml\ min^{-1}$ . UV absorbance was monitored at 280 nm. The amounts of Tyr and IDT in the  
449 hydrolysates were then determined by comparison with peak areas of authentic Tyr and IDT  
450 standards. Response factors were determined from three level calibrations with the Tyr and IDT  
451 standards.

452  
453 **Immuno-blot Analysis.** Plant material (100 mg of root from 15 days old seedlings grown as indicated  
454 before) was collected in a microfuge tube and ground in liquid nitrogen with 400  $\mu L$  of protein  
455 extraction buffer (125 mM Tris-Cl, pH. 4.4, 2% [w/v] SDS, 10% [v/v] glycerol, 6M UREA, 1% [v/v] b-  
456 mercaptoethanol, 1mM PMSF). Samples were immediately transferred to ice. After 4°  
457 centrifugations at 13000 rpm for 20 min, supernatant was move to a new 1.5 ml tube and equal  
458 volumes of Laemmli buffer (125 mM Tris-Cl, pH. 7.4, 4% [w/v] SDS, 40% [v/v] glycerol, 10% [v/v] b-  
459 mercaptoethanol, 0.002% [w/v] bromphenol blue) were added. The samples (0.5–1.0  $mg/mL$  of  
460 protein) were boiled for 5 min and 30  $\mu L$  were loaded on 10% SDS-PAGE. The proteins were  
461 separated by electrophoresis and transferred to nitrocellulose membranes. Anti-GFP mouse IgG

462 (clones 7.1 and 13.1; Roche Applied Science) was used at a dilution of 1:2,000 and it was visualized  
463 by incubation with goat anti-mouse IgG secondary antibodies conjugated to horseradish peroxidase  
464 (1:2,000) followed by a chemiluminescence reaction (Clarity Western ECL Substrate; Bio-rad). For  
465 the SS-TOM lines analysis, proteins were extracted in 2x SDS buffer (4% SDS, 125mM Tris pH 6.8,  
466 20% glycerol, 0.01% bromofenol blue, 50 mM dithiothreitol [DTT]), using 10 µl of buffer per mg of plant  
467 tissues of Wt Col-0, transgenic lines 35S:SS-TOM and 35S:SS-TOM-Long-EXT. Two transgenic lines  
468 were analyzed. 10 µl of supernatant of each protein extract were run into a 12% polyacrilamide gel  
469 during one hour at 200 V, and then transferred to a PVDF membrane. PVDF was blocked with 5%  
470 milk in TBST (Tris-HCl 10 mM, pH 7,4, NaCl 150 mM, Tween-20 al 0,05%) for 1 hour at 4°C and then  
471 washed four times during 15 min in TBST. An anti-RFP (A00682, GenScript) was used as primary  
472 antibody overnight at 4°C. Four washes of 15 min each in TBST at r.t. and then it was incubated two  
473 hours with a secondary antibody anti-rabbit (goat) conjugated with alkaline phosphatase (A3687,  
474 Sigma), in a 1:2,500 dilution with TBST. Four washes of 15 min each in TBST at room temperature.  
475 Finally, 10 ml of alkaline phosphatase (100mM Tris-HCl pH 9.5, 100 mM NaCl, 3 mM MgCl<sub>2</sub>)  
476 containing 80 µl NBT (Sigma) (35mg/ml in 70% DMSO and 30 µl de BCIP (Sigma) (50 mg/ml in 100%  
477 de DMSO) were used.

478  
479 **Transmission electron microscopy of root hair cell walls.** Seeds were germinated on 0.2x MS, 1%  
480 sucrose, 0.8% agar. Seven days after germination, seedlings were transferred to new 0.2x MS, 1%  
481 sucrose, 0.8% agar plates with or without 100 µM SHAM. After 4 additional days, 1-mm root  
482 segments with root hairs were fix in 2% glutaraldehyde in 0.1M cacodylate buffer pH7.4. Samples  
483 were rinsed in cacodylate buffer and post-fixed in 2% OsO<sub>4</sub>. After dehydration in ethanol and  
484 acetone, samples were infiltrated in Epon resin (Ted Pella, Redding, CA). Polymerization was  
485 performed at 60°C. Sections were stained with 2% uranyl acetate in 70% methanol followed by  
486 Reynold's lead citrate (2.6% lead nitrate and 3.5% sodium citrate [pH 12.0]) and observed in a Tecnai  
487 12 electron microscope. Quantitative analysis of cell wall thickness was performed using FIJI.

488  
489 **Modeling and molecular docking between PRXs and EXTs.** Modeling and molecular docking: cDNA  
490 sequences of PRXs were retrieved from TAIR (PRX01: AT1G05240, PRX36: AT3G50990, PRX44:  
491 AT4G26010, PRX64: AT5G42180, PRX73: AT5G67400) and NCBI Nucleotide DB (PRX24Gv:Vitis  
492 vinifera peroxidase 24, GvEP1, LOC100254434). Homology modeling was performed for all PRXs  
493 using modeller 9.14 (Sali et al. 1993), using the crystal structures 1PA2, 3HDL, 1QO4 and 1HCH as  
494 templates, available at the protein data bank. 100 structures were generated for each protein and  
495 the best scoring one (according to DOPE score) was picked. The *receptor* for the docking runs was  
496 generated by the prepare\_receptor4 script from autodock suite, adding hydrogens and constructing  
497 bonds. Peptides based on the sequence PYSPSPKVVYPPSSVYPPPPS were used, replacing proline  
498 by hydroxyproline, and/or adding *O*-Hyp glycosylation with up to four arabinoses per hydroxyproline  
499 in the fully glycosylated peptide and a galactose on the serine, as it is usual in plant *O*-Hyp

500 <https://www.ncbi.nlm.nih.gov/pmc/articles/PMC5045529/>. Ligand starting structure was generated  
501 as the most stable structure by molecular dynamics (Velasquez et al. 2015a). All ligand bonds were  
502 set to be able to rotate. Docking was performed in two steps, using Autodock vina (Trott et al.  
503 2010). First, an exploratory search over the whole protein surface (exhaustiveness 4) was done,  
504 followed by a more exhaustive one (exhaustiveness 8), reducing the search space to a 75x75x75 box  
505 centered over the most frequent binding site found in the former run.

506  
507 **EXT conformational coarse-grained model.** The use of coarse-grained (CG) molecular dynamics  
508 (MD) allowed collection of long timescale trajectories. System reduction is significant when  
509 compared to all atom models, approximately reducing on order of magnitude in particle number. In  
510 addition, a longer integration time step can be used. Protein residues and coarse grained solvent  
511 parameters correspond to the SIRAH model (Darré et al. 2015), while ad hoc specific glycan  
512 parameters were developed. The CG force field parameters developed correspond to  
513 arabinofuranose and galactopyranose (**Figure S5**). Triple helix systems were simulated both, in the  
514 non-glycosylated and fully *O*-glycosylated states, where all the hydroxyprolines are bound to a  
515 tetrasaccharide of arabinofuranoses, and specific serine residues contain one galactopyranose  
516 molecule. They were immersed in WT4 GC solvent box that was constructed to be 2 nm apart from  
517 the extensin fiber, and periodic boundary conditions were employed. Coarse grained ions were also  
518 included to achieve electroneutrality and 0.15 M ionic strength. All simulations were performed  
519 using the GROMACS MD package at constant temperature and pressure, using the Berendsen  
520 thermostat (respectively) and Parrinello-Rahman barostat (Parrinello and Rahman 1981), and a 10 fs  
521 time step. The obtained trajectories were analysed using the Mdtraj python package (McGibbon et  
522 al, 2015) and visualized with Visual Molecular Dynamics (VMD) 1.9.1 (Humphrey et al. 1996).  
523 Volume measurements were performed using a Convex Hull algorithm implemented in NumPy  
524 (Oliphant 2006), and average diameter calculations were derived from this quantity using simple  
525 geometric arguments.



526 **Acknowledgements**

527 We thank Andres Rossi from the microscopy facility of FIL for his assistance. We thank ABRC (Ohio  
528 State University) for providing T-DNA lines seed lines. J.M.E. is Principal Investigator of the National  
529 Research Council (CONICET) from Argentina. This work was supported by grants from ANPCyT  
530 (PICT2016-0132 and PICT2017-0066) and a grant from ICGEB CRP/ARG16-03 to J.M.E. In addition,  
531 this research is also funded by Instituto Milenio iBio – Iniciativa Científica Milenio, MINECON to  
532 J.M.E. and NSF MCB grant 1614965 to M.S.O.

533

534 **Author Contribution**

535 E.M and C.B performed most of the experiments and analysed the data. P.R. and C.D. analysed the  
536 peroxidase activity and performed phylogenetic analysis. J.W.M-E and M.H. analysed the Tyr-  
537 crosslinking on EXTs. A.A.A. and A.D.N performed the docking experiments and analysed this data.  
538 M.B. and L.C. perform the EXT modelling and analysed this data. M.F. and P.B generated the EXT  
539 reporter lines and performed the immune-blots analysis of SS-TOM and SS-TOM-Long-EXT lines.  
540 J.M.P., D.R.R.G., Y.d.C.R.G., S.M., and F.B.H. analysed the data. J.P., J.P-V., and M.S.O. performed the  
541 transmission electron microscopy analysis. J.M.E. designed research, analysed the data, supervised  
542 the project, and wrote the paper. All authors commented on the results and the manuscript. This  
543 manuscript has not been published and is not under consideration for publication elsewhere. All the  
544 authors have read the manuscript and have approved this submission.

545

546 **Competing financial interest**

547 The authors declare no competing financial interests. Correspondence and requests for materials  
548 should be addressed to J.M.E. (Email: [jestevez@leloir.org.ar](mailto:jestevez@leloir.org.ar) / [jose.estevez@unab.cl](mailto:jose.estevez@unab.cl)).

549 **REFERENCES**

- 550 Baumberger N, Ringli C, Keller B. (2001). The chimeric leucine rich repeat/extensin cell wall protein  
551 LRX1 is required for root hair morphogenesis in *Arabidopsis thaliana*. *Genes & Development* 15,  
552 1128–1139.
- 553 Baumberger N, Steiner M, Ryser U, Keller B, Ringli C. (2003). Synergistic interaction of the two  
554 paralogous Arabidopsis genes LRX1 and LRX2 in cell wall formation during root hair  
555 development. *Plant J.* 35, 71–81.
- 556 Berendsen, H. J. C., Postma, J.P.M., van Gunsteren, W.F., DiNola, A., and Haak, J.R. (1984) Molecular  
557 dynamics with coupling to an external bath. *J. Chem. Phys.* 81, 3684. doi: 10.1063/1.448118.
- 558 Berman HM, John Westbrook, Zukang Feng, Gary Gilliland, Talapady N Bhat, Helge Weissig, Ilya N  
559 Shindyalov, and Philip E Bourne. The protein data bank. *Nucleic Acids Research*, 28(1):235–242,  
560 2000.
- 561 Bernards, M.A., Fleming, W.D., Llewellyn, D.B., Priefer, R., Yang, X., Sabatino, A., and Plourde, G.L.  
562 (1999). Biochemical characterization of the suberization-associated anionic peroxidase of  
563 potato. *Plant Physiol.* 121: 135–146.
- 564 Bhawe G, Cummings CF, Vanacore RM, Kumagai-Cresse C, Ero-Tolliver IA, Rafi M, Kang J-S,  
565 Pedchenko V, Fessler LI, Fessler JH, Hudson BG (2012) Peroxidase forms sulfilimine chemical  
566 bonds using hypohalous acids in tissue genesis. *Nat. Chem. Biol.* 8:784–790.
- 567 Brady, J.D., Sadler, I.H., and Fry, S.C. (1996). Di-isodityrosine, a novel tetrameric derivative of  
568 tyrosine in plant cell wall proteins: a new potential cross-link. *Biochem. J* 315: 323–327.
- 569 Brady, J.D., Sadler, I.H., and Fry, S.C. (1998). Pulcherosine, an oxidatively coupled trimer of tyrosine  
570 in plant cell walls: its role in cross-link formation. *Phytochemistry.* 47(3):349-353.
- 571 Brown K.L, C.F. Cummings, R.M. Vanacore and B.G. Hudson. (2017). Building collagen IV smart  
572 scaffolds on the outside of cells. *Protein Sci.* 26:2151-2161.
- 573 Brownleader, M.D., Ahmed, N., Trevan, M., Chaplin, M.F., and Dey, P.M. (1995). Purification and  
574 partial characterization of Tomato extensin peroxidase. *Plant Physiol.* 109: 1115–1123
- 575 Cannon, M.C., Terneus, K., Hall, Q., Tan, L., Wang, Y., Wegenhart, B.L., Chen, L., Lampert, D.T., Chen,  
576 Y., and Kieliszewski, M.J. (2008). Self-assembly of the plant cell wall requires an extensin  
577 scaffold. *Proc. Natl. Acad. Sci. USA.* 105: 2226–2231.
- 578 Chen, Y., Dong, W., Tan, L., Held, M. A., & Kieliszewski, M. J. (2015). Arabinosylation plays a crucial  
579 role in extensin cross-linking in vitro. *Biochemistry insights*, 8, BCI-S31353.
- 580 Cosio C. & Dunand C. (2009). Specific functions of individual class III peroxidases genes. *J. Exp. Bot.*  
581 62:391–408.
- 582 Cosio C., Ranocha Ph., Francoz E., Burlat V., Zheng Y., Perry S.E., Ripoll J.-J., Yanofsky M., Dunand C.  
583 (2017) The class III peroxidase PRX017 is a direct target of the MADS-box transcription factor 1  
584 AGL15 and participates in lignified tissue formation. *New Phytol.* 213: 250-263.
- 585 Darré, L., Machado, M.R., Brandner, A.F., González, H.C., Ferreira, S., and Pantano, S. (2015). SIRAH:  
586 A structurally unbiased coarse-grained force field for proteins with aqueous solvation and long-  
587 range electrostatics. *J. Chem. Theory Comput.* 11(2):723–739
- 588 Dong, W., Kieliszewski, M., and Held, M.A. (2015). Identification of the pI 4.6 extensin peroxidase  
589 from *Lycopersicon esculentum* using proteomics and reverse-genomics. *Phytochem.* 112:151–  
590 159.

- 591 Dunand, C., Crevecoeur, M., and Penel, C. (2007). Distribution of superoxide and hydrogen peroxide  
592 in Arabidopsis root and their influence on root development: possible interaction with  
593 peroxidases. *New Phytol.* 174:332–341.
- 594 Francoz et al. (2019) Pectin demethylesterification generates platforms that anchor peroxidases to  
595 remodel plant cell wall domains. *Developmental Cell* 48, 1-16.
- 596 Held, M. A., Tan, L., Kamyab, A., Hare, M., Shpak, E., and Kieliszewski, M. J. (2004). Di-isodityrosine is  
597 the intermolecular cross-link of isodityrosine-rich extensin analogs cross-linked in vitro. *Journal*  
598 *of Biological Chemistry*, 279(53), 55474-55482.
- 599 Humphrey, W., Dalke, A., and Schulten, K. (1996). VMD: Visual molecular dynamics. *J. Molec.*  
600 *Graphics* 14:33-38
- 601 Jackson, P.A., Galinha, C.I., Pereira, C.S., Fortunato, A., Soares, N.C., Amâncio, S.B., and Pinto  
602 Ricardo, C.P. (2001). Rapid deposition of extensin during the elicitation of grapevine callus  
603 cultures is specifically catalyzed by a 40-kilodalton peroxidase. *Plant Physiol.* 127: 1065–1076.
- 604 Jacobowitz, J.R, Doyle W.C., and Weng, J-K. (2019). PRX9 and PRX40 are extensin peroxidases  
605 essential for maintaining tapetum and microspore cell wall integrity during Arabidopsis anther  
606 development. *Plant Cell* 31: 848–86.
- 607 Kim D Pruitt, Tatiana Tatusova, and Donna R Maglott. Ncbi reference sequences (refseq): a curated  
608 non-redundant sequence database of genomes, transcripts and proteins. *Nucleic Acids Research*,  
609 35(suppl 1):D61–D65, 2006.
- 610 Kumar, S., Stecher G., Tamura K. (2016) MEGA7: molecular evolutionary genetic analysis version  
611 7.0 for bigger datasets. *Mol. Biol. Evol.* 33(7): 1870-1874.
- 612 Lamport, D.T.A., Kieliszewski, M.J., Chen, Y., and Cannon, M.C. (2011). Role of the extensin  
613 superfamily in primary cell wall architecture. *Plant Physiol.* 156: 11–19.
- 614 Lee, Y., Rubio, M.C., Alassimone, J., and Geldner, N. (2013). A mechanism for localized lignin  
615 deposition in the endodermis. *Cell* 153: 402–412.
- 616 Mangano S. et al. (2017). The molecular link between auxin and ROS-controlled root hair growth.  
617 *Proc. Natl. Acad. Sci. U.S.A.* 114(20):5289-5294.
- 618 Marzol E, Borassi C, Bringas M, Sede A, Rodríguez Garcia DR, Capece L, Estevez JM. (2018). Filling the  
619 Gaps to Solve the Extensin Puzzle. *Mol Plant.* 11(5):645-658.
- 620 McGibbon R.T, Beauchamp K.A., Harrigan M.P., Klein C., Swails, J.M., Hernández C.X., Schwantes  
621 C.R., Wang, L.P., Lane T.J., Pande V.S. (2015) MDTraj: A Modern Open Library for the Analysis of  
622 Molecular Dynamics Trajectories. *Biophysical Journal*, 109(8): 1528-1532
- 623 Mutwil, M., Klie, S., Tohge, T., Giorgi, F.M., Wilkins, O., Campbell, M.M., Fernie, A.R., Usadel, B.,  
624 Nikoloski, Z. and Persson, S. (2011). PlaNet: combined sequence and expression comparisons  
625 across plant networks derived from seven species. *Plant Cell*, 23, 895– 910.
- 626 Oliphant, TE. USA: Trelgol Publishing, (2006). A guide to NumPy. 376 pp.
- 627 Parrinello, M. and Rahman, A. (1981). Polymorphic transitions in single crystals: A new molecular  
628 dynamics method. *J. of Applied Physics* 52:7182. doi.org/10.1063/1.328693
- 629 Passardi, F., Penel, C., and Dunand, C. (2004). Performing the paradoxical: how plant peroxidases  
630 modify the cell wall. *Trends Plant Sci.* 9:534–540.
- 631 Pereira S.P., J.M.L. Ribeiro, A.D. Vatulescu, K. Findlay, A.J. MacDougall and P.A.P. Jackson. (2011)  
632 Extensin network formation in *Vitis vinifera* callus cells is an essential and causal event in rapid  
633 and H<sub>2</sub>O<sub>2</sub>-induced reduction in primary cell wall hydration. *BMC Plant Biology* 111:106-121.

- 634 Price, N.J., Pinheiro, C., Soares, C.M., Ashford, D.A., Ricardo, C.P., and Jackson, P.A. (2003). A  
635 biochemical and molecular characterization of LEP1, an extensin peroxidase from lupin. *J. Biol.*  
636 *Chem.* 278:41389–41399.
- 637 Ringli C. (2010). The hydroxyproline-rich glycoprotein domain of the Arabidopsis LRX1 requires Tyr  
638 for function but not for insolubilization in the cell wall. *Plant J.* 63, 662–669.
- 639 Saitou N, Nei M. (1987). The neighbor-joining method: a new method for reconstruction of  
640 phylogenetic trees. *Mol Biol Evol*4:406–25.
- 641 Šali A., and Tom L Blundell. (1993). Comparative protein modelling by satisfaction of spatial  
642 restraints. *J. of Molecular biology*, 234(3):779–815.
- 643 Savelli B., Li Q., Webber M., Jemmat A.M., Robitaille A., Zamocky M., Mathe C., Dunand C. (2019).  
644 RedoxiBase a database for ROS homeostasis regulated proteins. *Redox Biol.*  
645 doi.org/10.1016/j.redox.2019.101247.
- 646 Schnabelrauch, L.S., Kieliszewski, M., Upham, B.L., Alizedeh, H., and Lamport, D. (1996). Isolation of  
647 pl 4.6 extensin peroxidase from tomato cell suspension cultures and identification of Val-Tyr-Lys  
648 as putative intermolecular cross-link site. *Plant J.* 9:477–489.
- 649 Sede, A.R., Borassi, C., Wengier, D.L., Mecchia, M.A., Estevez, J.M., and Muschietti, J.P. (2018).  
650 Arabidopsis pollen extensins LRX are required for cell wall integrity during pollen tube growth.  
651 *FEBS Lett.* 592, 233–243.
- 652 Shen Y., Rosendale M., Campbell R.E., D. Perrais (2014). pHuji, apH-sensitive red fluorescent protein  
653 for imaging of exo- and endocytosis. *J. Cell Biol.* 207 (3):419-432.
- 654 Smith, A.T., Santama, N., Dacey, S., Edwards, M., Bray, R.C., Thorneley, R.N., and Burke, J.F. (1990).  
655 Expression of a synthetic gene for horseradish peroxidase C in *Escherichia coli* and folding and  
656 activation of the recombinant enzyme with Ca<sup>2+</sup> and heme. *J. Biol. Chem.* 265: 13335–13343.
- 657 Stoddard, A and Rolland, V. (2018). I see the light!. Fluorescent proteins suitable for the cell  
658 wall/apoplast targeting in *Nicotiana benthamiana* leaves. *Plant Direct.* doi.org/10.1002/pld3.112
- 659 Strasser, R. (2016). Plant protein glycosylation. *Glycobiology.* 26(9):926–939.
- 660 Stratford, S., et al. (2001). A leucine-rich repeat region is conserved in pollen extensin-like (Pex)  
661 proteins in monocots and dicots. *Plant Mol. Biol.* 46:43–56.
- 662 Trott O., and Arthur J Olson. (2010). Autodock vina: improving the speed and accuracy of docking  
663 with a new scoring function, efficient optimization, and multithreading. *Journal of*  
664 *Computational Chem.* 31(2):455–461.
- 665 Vanacore R, Ham AJ, Voehler M, Sanders CR, Conrads TP, Veenstra TD, Sharpless KB, Dawson PE,  
666 Hudson BG (2009) A sulfilimine bond identified in collagen IV. *Science* 325:1230–1234.
- 667 Velasquez, S.M., Ricardi, M.M., Dorosz, J.G., Fernandez, P.V., Nadra, A.D., Pol-Fachin, L., Egelund, J.,  
668 Gille, S., Ciancia, M., Verli, H., et al. (2011). O-glycosylated cell wall extensins are essential in root  
669 hair growth. *Science* 332:1401–1403.
- 670 Velasquez M, Salter JS, Dorosz JG, Petersen BL, Estevez JM. (2012). Recent advances on the  
671 posttranslational modifications of EXTs and their roles in plant cell walls. *Frontiers in plant*  
672 *science* 3, 93.
- 673 Velasquez SM, Marzol E, Borassi C, Pol-Fachin L, Ricardi MM, Mangano S, Denita JS, Salgado SJ,  
674 Gloazzo DJ, Marcus SE. (2015a). Low sugar is not always good: Impact of specific O-glycan  
675 defects on tip growth in Arabidopsis. *Plant Physiology* 168, 808–813.

- 676 Velasquez, S.M., Ricardi, M.M., Poulsen, C.P., Oikawa, A., Dilokpimol, A., Halim, A., Mangano, S.,  
677 Denita-Juarez, S.P., Marzol, E., Salgoda Salter, J.D., et al. (2015b). Complex regulation of prolyl-4-  
678 hydroxylases impacts root hair expansion. *Mol. Plant* 8:734–746.
- 679 Wang, X., Wang, K., Yin, G., Liu, X., Liu, M., Cao, N., Duan, Y., Gao, H., Wang, W., Ge, W., et al.  
680 (2018). Pollen-expressed leucine-rich repeat extensins are essential for pollen germination and  
681 growth. *Plant Physiol.* 176, 1993–2006.
- 682 Wojtaszek, P., Trethowan, J., and Bolwell, G.P. (1997). Reconstitution in vitro of the components and  
683 conditions required for the oxidative cross-linking of extracellular proteins in French bean  
684 (*Phaseolus vulgaris* L.). *FEBS Lett.* 405:95–98.
- 685 Yi K, Menand B, Bell E, Dolan L. (2010). A basic helix-loop-helix transcription factor controls cell  
686 growth and size in root hairs. *Nature genetics* 43: 264-267.

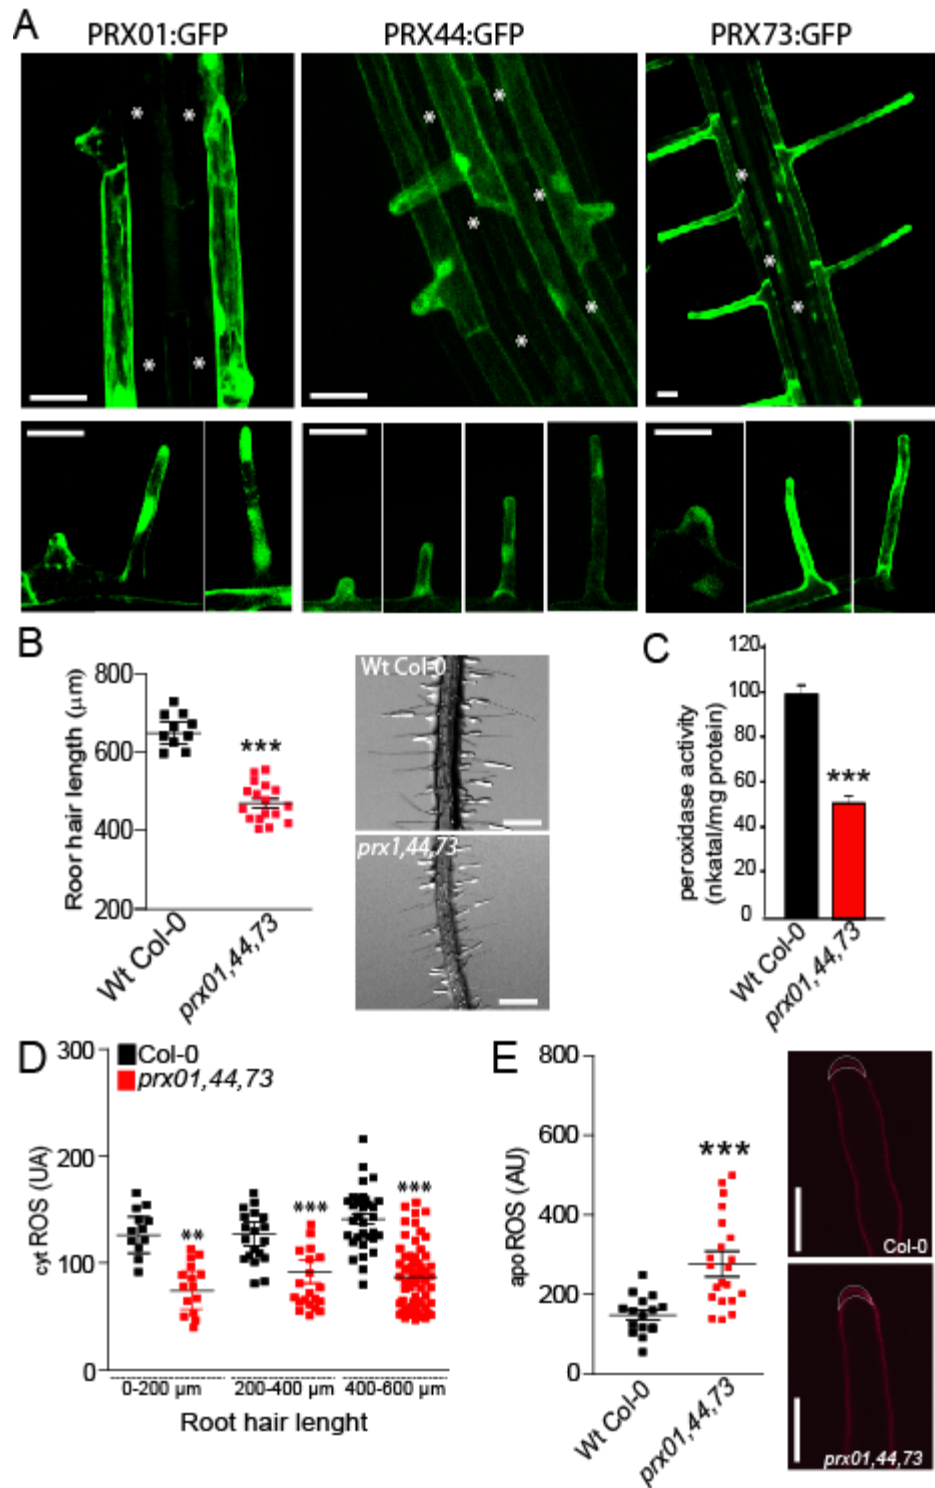

687

688

689

690

Figure 1. Characterization of root hair-specific PRX01, PRX44 and PRX73 expression and mutant analysis.

691 **(A)** GFP-tagged transcriptional reporters of PRX01, PRX44 and PRX73 show expression in the root  
692 elongation zone and specifically in root hairs (bottom). Scale bar = 20  $\mu$ m. (\*) indicates atrichoblast  
693 cell layers, which lack GFP expression.

694 **(B)** Root hair length phenotype of Wt and the *prx01,44,73* triple mutant. Left, box-plot of root hair  
695 length. Horizontal lines show the means. P-value determined by one-way ANOVA, (\*\*\*)  $P < 0.001$ .  
696 Right, bright-field images exemplifying the root hair phenotype in each genotype. Scale bars, 1 mm.

697 **(C)** Peroxidase activity in Wt and *prx01,44,73* triple mutant roots. Enzyme activity values (expressed  
698 as nkatal/mg protein) are shown as the mean of three replicates  $\pm$  SD. P-value determined by one-  
699 way ANOVA, (\*\*\*)  $P < 0.001$ .

700 **(D)** Cytoplasmic ROS levels measured with H<sub>2</sub>DCF-DA in Wt and *prx01,44,73* triple mutant root hairs.  
701 Horizontal lines show the means. P-values determined by one-way ANOVA, (\*\*\*)  $P < 0.001$  and (\*\*)  
702  $P < 0.01$ .

703 **(E)** Apoplastic ROS levels measured with Amplex™ UltraRed (AUR) in Wt and *prx01,44,73* triple  
704 mutant root hairs. ROS signal was quantified from the root hair cell tip. Left, box-plot of apoROS  
705 values. Horizontal lines show the means. P-value determined by one-way ANOVA, (\*\*\*)  $P < 0.001$ .  
706 Right, fluorescence images exemplifying apoROS detection in root hair apoplast.

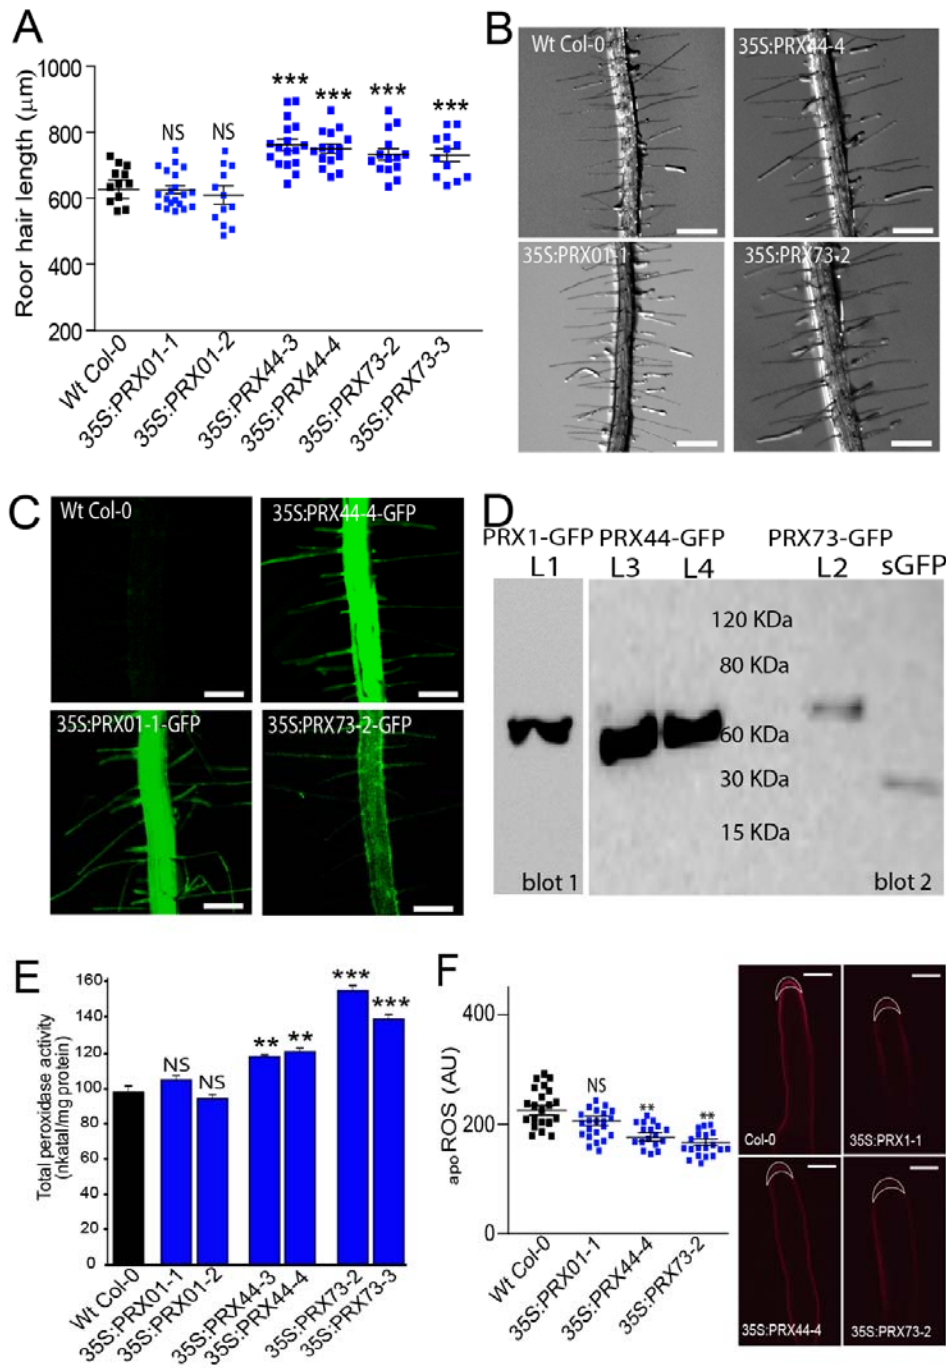

707  
708

709 **Figure 2. Over-expression of PRX44 and PRX73 promotes root hair growth and higher root**  
710 **peroxidase activity.**

711 (A) Root hair length phenotype of Wt and PRX<sup>OE</sup> lines (in Wt background). Box-plot of root hair  
712 length. Horizontal lines show the means. P-values determined by one-way ANOVA, (\*\*\*) P<0.001,  
713 (NS) not significantly different.



714 **(B)** Bright-field images exemplifying the root hair phenotype analyzed in Figure 2A. Scale bar = 0.5  
715 mm.

716 **(C)** Expression of GFP-tagged 35S:PRX01, 35S:PRX44 and 35S:PRX73 in root hair cells.

717 **(D)** Western blot of PRX01-GFP, PRX44-GFP and PRX73-GFP. Soluble GFP (sGFP) was used as control.  
718 The predicted molecular weights are 62.6 KDa for PRX01-GFP, 60.8 KDa for PRX44-GFP, 62.9 KDa for  
719 PRX73 and 27 KDa for sGFP.

720 **(E)** Assays of total peroxidase activity in Wt and PRXs<sup>OE</sup> lines (in Wt background). Enzyme activity  
721 (expressed in nkatal/mg protein) was determined by a guaiacol oxidation-based assay. Values are  
722 the mean of three replicates  $\pm$  SD. P-values determined by one-way ANOVA, (\*\*\*) P<0.001, (\*\*)  
723 P<0.01, (NS) not significantly different.

724 **(F)** Apoplastic ROS levels measured with Amplex™ UltraRed (AUR) in Wt and PRX<sup>OE</sup> lines (in Wt  
725 background). ROS signal was quantified from the root hair cell tip. Left, box plot of apoROS values.  
726 Horizontal lines show the means. P-values determined by one-way ANOVA, (\*\*) P<0.01, (NS) not  
727 significantly different. Right, fluorescence images exemplifying apoROS detection in root hair  
728 apoplast. Scale bar = 10  $\mu$ m.

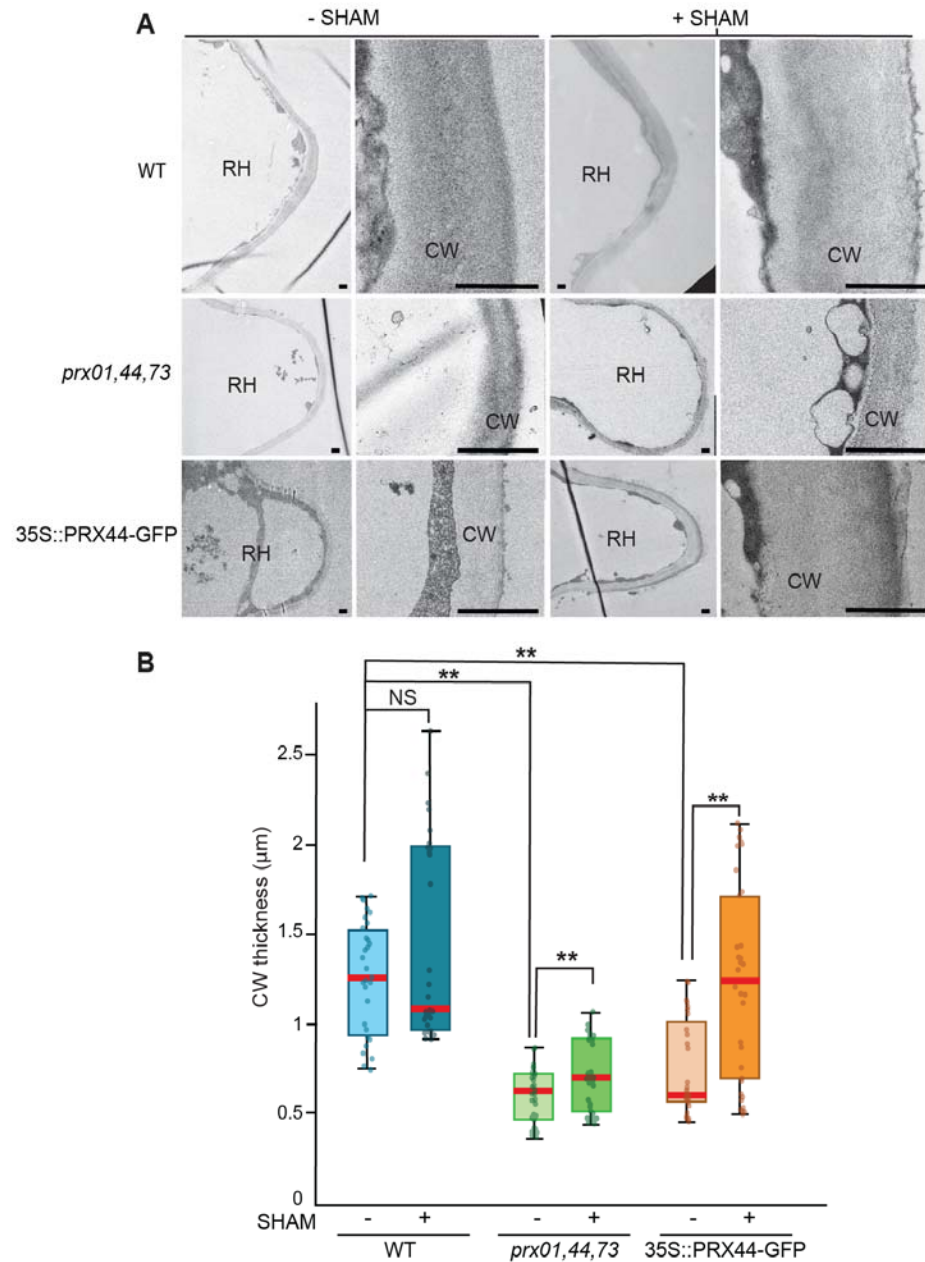

729  
730

731 **Figure 3. Effect of PRX expression on cell wall thickness in root hair tips.**

732 (A) Transmission electron micrographs of root hair tips from *Wt*, *prx1,44,73* triple mutant, and  
733 PRX44<sup>OE</sup> with (+) and without (-) peroxidase inhibitor SHAM. For each genotype and treatment, a  
734 representative overview of a root hair (RH) and a detail of the cell wall at the root hair tip (CW) is  
735 shown. Scale bar = 1 μm.

736 **(B)** Box and whisker plot showing cell wall thickness measured at the root hair tip of the three  
737 genotypes with or without SHAM treatment. (\*\*)  $P \leq 0.001$  determined by t-test. (NS) not  
738 significantly different.

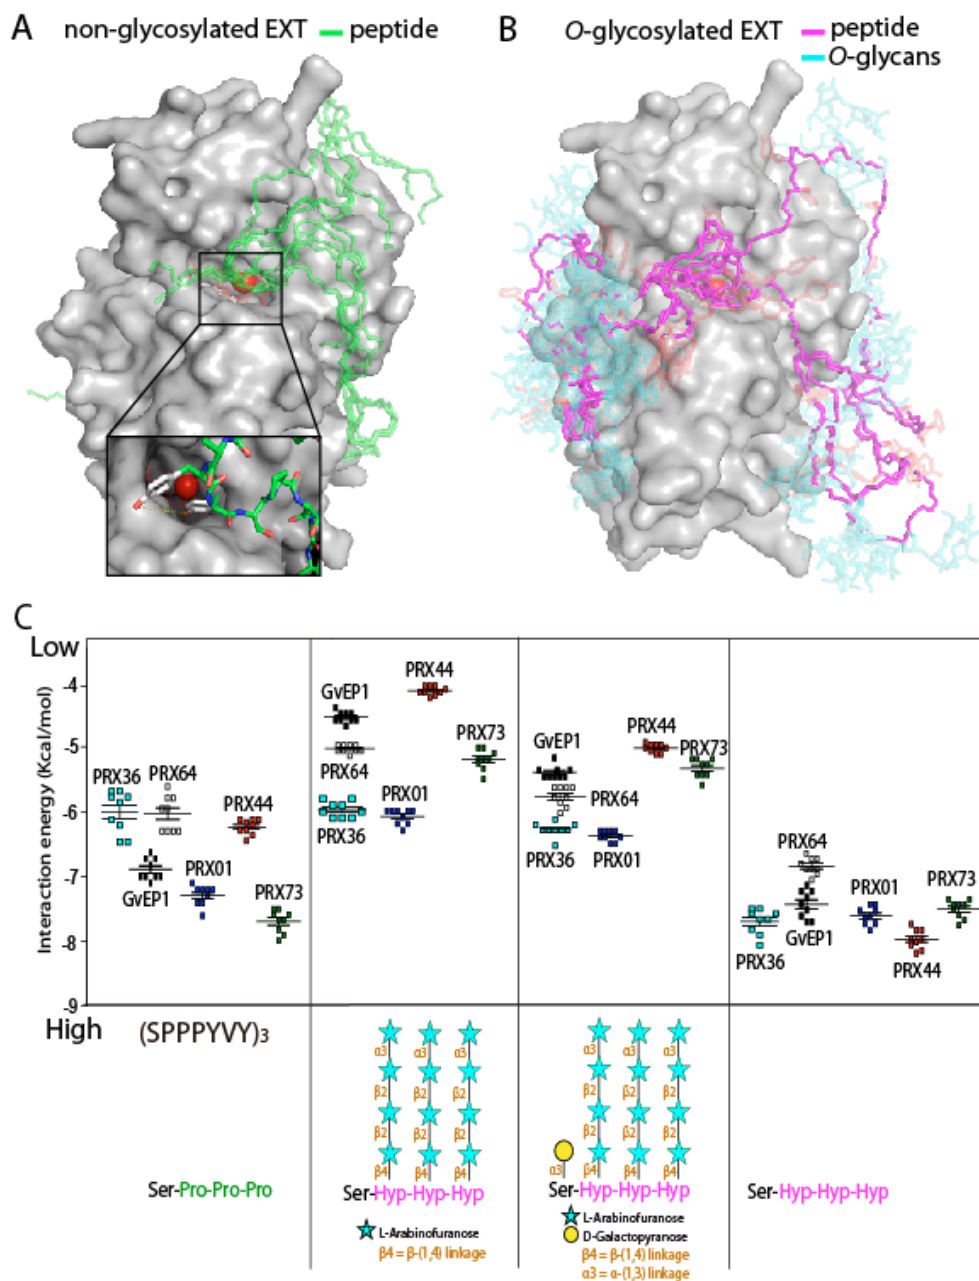

739

740

741 **Figure 4. Interaction by an *in silico* docking approach of PRX01, PRX44 and PRX73 with EXT**  
742 **peptides.**

743 (A,B) Ten docking results for each EXT O-glycosylation state are shown superimposed on the PRX44  
744 protein surface to evaluate the consistence of docking sites.

745 (A) Model of PRX44 (protein surface shown in gray) complexed to a non-O-glycosylated EXT  
746 substrate (SPPPYVY)<sub>3</sub> (in green, depicted as sticks). Heme is depicted as thin sticks while iron is a red  
747 sphere. Bottom inset, two close tyrosine residues dock near to the possible active site of PRX44.

748 **(B)** Model of PRX44 (protein surface shown in gray) complexed to an *O*-glycosylated-EXT substrate  
749 (protein backbone shown in magenta, and *O*-glycans shown in light blue, both depicted as sticks).  
750 Heme is depicted as thin sticks while iron is a red sphere. Arabino-galactosylated EXT peptide =  
751 [(SOOOYVY)<sub>3</sub>-AG].

752 **(C)** Comparison of the binding energy of different peroxidases to EXT substrates with different  
753 degrees of *O*-glycosylation. A non-hydroxylated EXT peptide (SPPYVY)<sub>3</sub>, a hydroxylated but not *O*-  
754 glycosylated EXT peptide [(SOOOYVY)<sub>3</sub>; O=hydroxyproline], only arabinosylated EXT-peptide  
755 [(SOOOYVY)<sub>3</sub>-A], and arabino-galactosylated EXT peptide [(SOOOYVY)<sub>3</sub>-AG] were analyzed.

756 **Table 1.** Peptidyl-Tyr and iso-dityrosine (IDT) contents in cell walls isolated from Wt, *prx01,44,73*  
 757 triple mutant, PRX<sup>OE</sup> lines and mutant lines with under-glycosylated EXTs. P-values were determined  
 758 by one-way ANOVA, (\*\*\*) P<0.001, (\*\*) P<0.01. STD=Standard Deviation. Values significantly  
 759 different than Wt are highlighted in blue if higher and in light blue if lower than Wt Col-0.  
 760

|                                  | ng Tyr/μg CW (STD) | ng IDT/μg CW (STD) |
|----------------------------------|--------------------|--------------------|
| Wt Col-0                         | 7.799 ± 0.26       | 0.853 ± 0.08       |
| <i>prx01 prx44 prx73</i>         | 9.588 ± 0.31**     | 0.963 ± 0.02       |
| PRX44 <sup>OE</sup>              | 8.649 ± 0.07       | 0.953 ± 0.04       |
| PRX73 <sup>OE</sup>              | 8.700 ± 0.12       | 1.042 ± 0.02**     |
| <i>under O-glycosylated EXTs</i> |                    |                    |
| <i>sergt1-1 rra3</i>             | 3.530 ± 0.08***    | 0.235 ± 0.01***    |
| <i>p4h5 sergt1-1</i>             | 3.766 ± 0.06***    | 0.225 ± 0.02***    |

761

762 **Supplementary Information**

763

764 **Class III peroxidases PRX01, PRX44, and PRX73 potentially target extensins during root hair**  
765 **growth in *Arabidopsis thaliana***

766

767

768 Eliana Marzol, Cecilia Borassi, Philippe Ranocha, Ariel. A. Aptekman, Mauro Bringas, Janice  
769 Pennington, Julio Paez-Valencia, Javier Martínez Pacheco, Diana Rosa Rodríguez Garcia, Yossmayer  
770 Rondon, Mariana Carignani, Silvina Mangano, Margaret Fleming, John W. Mishler-Elmore, Francisca  
771 Blanco-Herrera, Patricia Bedinger, Christophe Dunand, Luciana Capece, Alejandro D. Nadra, Michael  
772 Held, Marisa Otegui & José M. Estevez

773

774

775 † Correspondence should be addressed. Email: [jestevez@leloir.org.ar](mailto:jestevez@leloir.org.ar) / [jose.estevez@unab.cl](mailto:jose.estevez@unab.cl)  
776 (J.M.E).

777

778

779 The following Supporting Information is available for this article:

780 Supplementary Figures S1-S7

781 Supplementary Table S1

782 Supplementary References 6

783 **Table S1.** Volume and average diameter measurements of EXTs from molecular dynamics  
784 simulations. These magnitudes were measured in the fully extended EXT system. Values shown are  
785 the mean  $\pm$  standard deviation.  
786

|                         | <b>Non-glycosylated EXT</b> | <b>O-glycosylated EXT</b> | <b>O-glycosylated EXT (protein only)</b> |
|-------------------------|-----------------------------|---------------------------|------------------------------------------|
| Volume /nm <sup>3</sup> | 280 $\pm$ 30                | 1080 $\pm$ 50             | 450 $\pm$ 30                             |
| EXT length /nm          | 65 $\pm$ 2                  | 70 $\pm$ 2                | 70 $\pm$ 2                               |
| Average diameter /nm    | 2.4                         | 4.5                       | 2.9                                      |
| Distance Tyr-Tyr        |                             |                           |                                          |
| 0-5 Å                   | 20%                         | 25%                       | -                                        |
| 5-7 Å                   | 55%                         | 65%                       | -                                        |

787



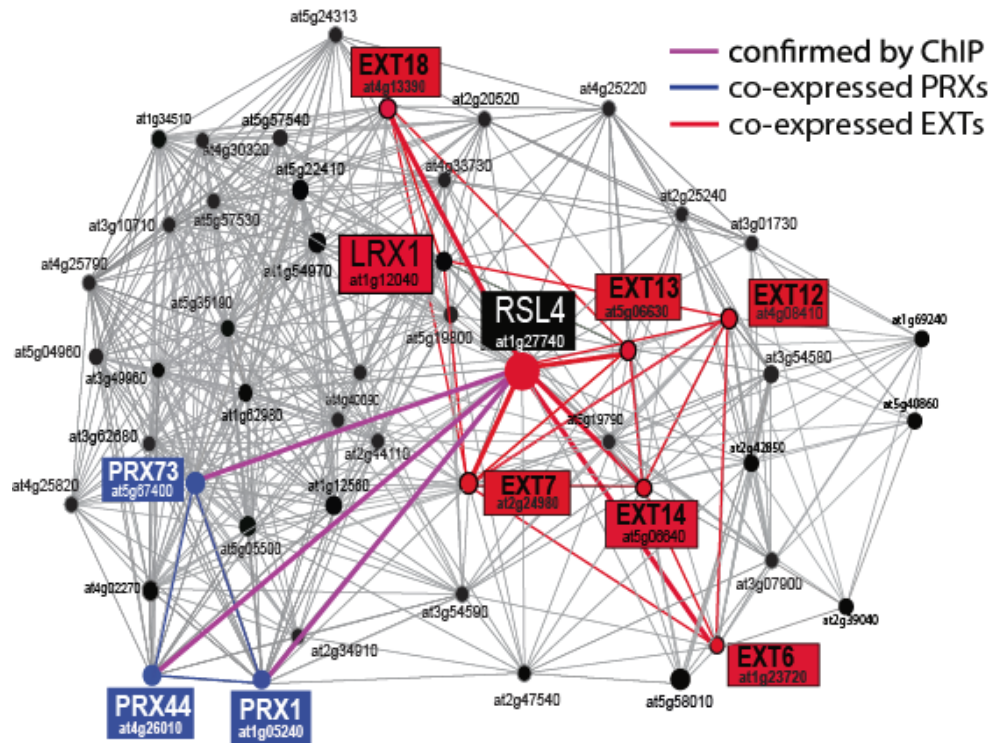

788  
789

790 **Figure S1. Root hair transcriptional co-expression network.** PRXs, EXTs, and the transcriptional  
791 regulator RSL4 are highlighted. RSL4 was used as gene bait to narrow down the number of co-  
792 expressed genes. Transcriptional connections between RSL4 (in black), EXTs (in red) and PRXs genes  
793 (in blue). The co-expression network was identified from PLaNet ([http://aranet.mpimp-  
794 golm.mpg.de/aranet](http://aranet.mpimp-golm.mpg.de/aranet)) (Mutwil et al., 2011) and trimmed to facilitate readability. Chromatin  
795 immunoprecipitation assay (ChIP) showed that RSL4 binds and controls the expression of  
796 PRX01,44,73 (Mangano et al. 2017). Figure modified from Marzol et al. (2018).

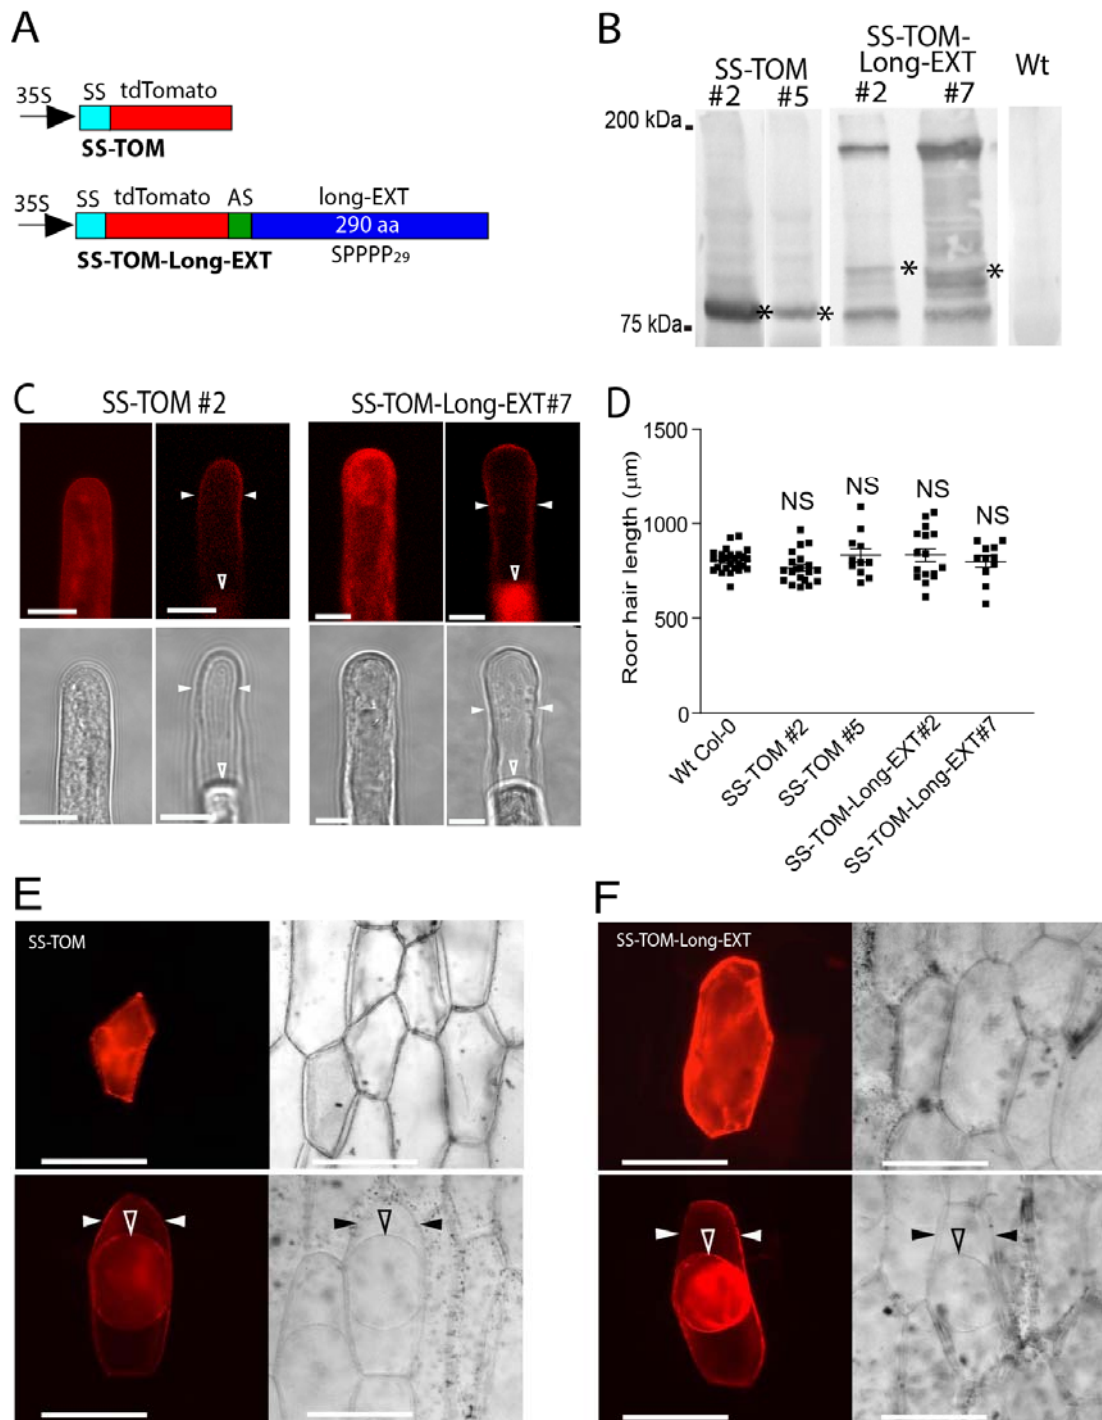

797

798

799 **Figure S2. EXT reporter is targeted to root hair and onion epidermal cell walls.**

800 (A) Schematic diagrams of SS-TOM and SS-TOM-Long-EXT constructs expressed under the control of  
 801 the 35S promoter in Arabidopsis plants. SS, tomato polygalacturonase signal sequence. AS, Ala-  
 802 spacer, 6 alanines between tdTomato (TOM) and Long-EXT domain. Long-EXT, C-terminal 290 amino  
 803 acids of *SIPEX1*, which includes only two tyrosines at the C-terminus.

804 **(B)** Expression and detection of EXT-reporters in homozygous *Arabidopsis* lines. Lines expressing  
805 detectable levels of SS-TOM (lines #2 and #5) and SS-TOM-Long-EXT (lines #2 and #7) showed  
806 similarly unexpectedly large sizes of protein on the Western blot, with bands much larger than 94  
807 kDa (the predicted size of the unmodified EXT protein). All the gel blots shown are part of the same  
808 run.

809 **(C)** Expression of SS-TOM and SS-TOM-Long-EXT reporters in *Arabidopsis* root hair cells. (Top)  
810 Fluorescence images showing cell-wall localization of the reporter protein: left, cells with normal  
811 cytoplasm; right, cells after plasmolysis in 1 M NaCl. (Bottom) Bright-field images of the same cells  
812 shown above. Cell wall location is denoted with solid arrowheads while plasma membrane is  
813 indicated with an unfilled arrowhead. Scale bar = 10  $\mu$ m.

814 **(D)** Root hair phenotype of Wt, SS-TOM (#2 and #5) and SS-TOM-Long-EXT (#2 and #7) (in Wt  
815 background) as box-plot. Horizontal lines show the means. NS = not significantly different,  
816 determined by one-way ANOVA.

817 **(E)** Onion epidermis expressing SS-TOM. (On the right) Bright field images. (On the bottom) cells  
818 were plasmolyzed in 1 M NaCl. Cell wall location is denoted with solid arrowheads while plasma  
819 membrane is indicated with an unfilled arrowhead. Scale bar = 100  $\mu$ m. SS = Signal Peptide. TOM =  
820 Tomato fluorescent protein.

821 **(F)** Onion epidermis expressing SS-TOM-Long-EXT. (On the right) Bright fields images. (On the  
822 bottom) Cells were plasmolyzed in 1 M NaCl. Cell wall location is denoted with solid arrowheads  
823 while plasma membrane is indicated with an unfilled arrowhead. Scale bar = 100  $\mu$ m. SS = Signal  
824 Peptide. TOM = Tomato fluorescent protein. Long-EXT = C-terminal 290 amino acids of *Solanum*  
825 *lycopersicum* (Sl) *SIPEX1*.

826

827

828

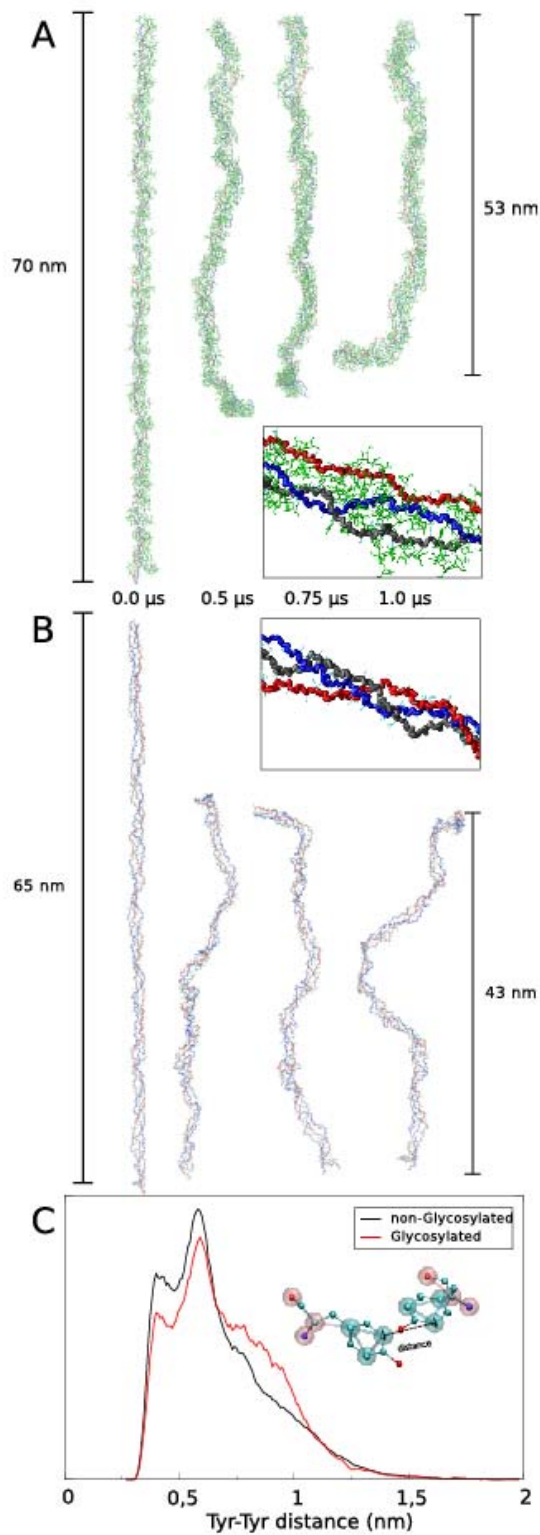

### Figure S3. Effect of the *O*-glycosylation status on the triple helix EXT assembly and Tyr-Tyr distances.

Selected snapshots of the *O*-glycosylated (**A**) and non-glycosylated (**B**) triple EXT chain molecular dynamics (MD) trajectory, showing the stability of the triple helix during a 1  $\mu$ s MD simulation. The results obtained in these simulations highlight the importance of the triple-helix EXT in overall protein stability, and especially the maintenance of the fibril-like structure. Peptide chains are depicted in red, black and blue and glycans in green. In these simulations the peptide chains are allowed to move freely inside the simulation box, without any restrictions. Insets: a snapshot of a 25 amino acid portion of the triple helix taken from the CG MD trajectory. (**C**) Distribution of the Tyr-Tyr distances along the MD simulations for the glycosylated (red line) and non-glycosylated (black line) states. Distances are measured between the C-*orthos* of each Tyr residue (as depicted in the inset of the figure).

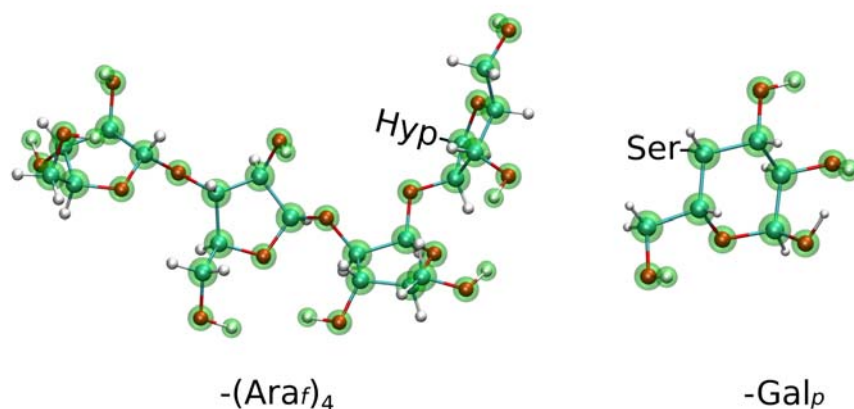

861

862 **Figure S4. Coarse-grained models for tetra-arabinofuranose and galactopyranose moieties (diffuse**

863 **green spheres) superimposed on all atom description (solid spheres connected by tubes).**

864 Interaction points or beads are located in the position of the heavy atoms and hydrogens

865 corresponding to hydroxyl groups. The latter were included due to the importance of directional

866 hydrogen bond-like interactions in this class of molecules. Mass and Lennard-Jones parameters of

867 CG beads and spring constants for intramolecular interactions were chosen to be compatible with

868 the SIRAH coarse-grained model (parameters are available upon request).

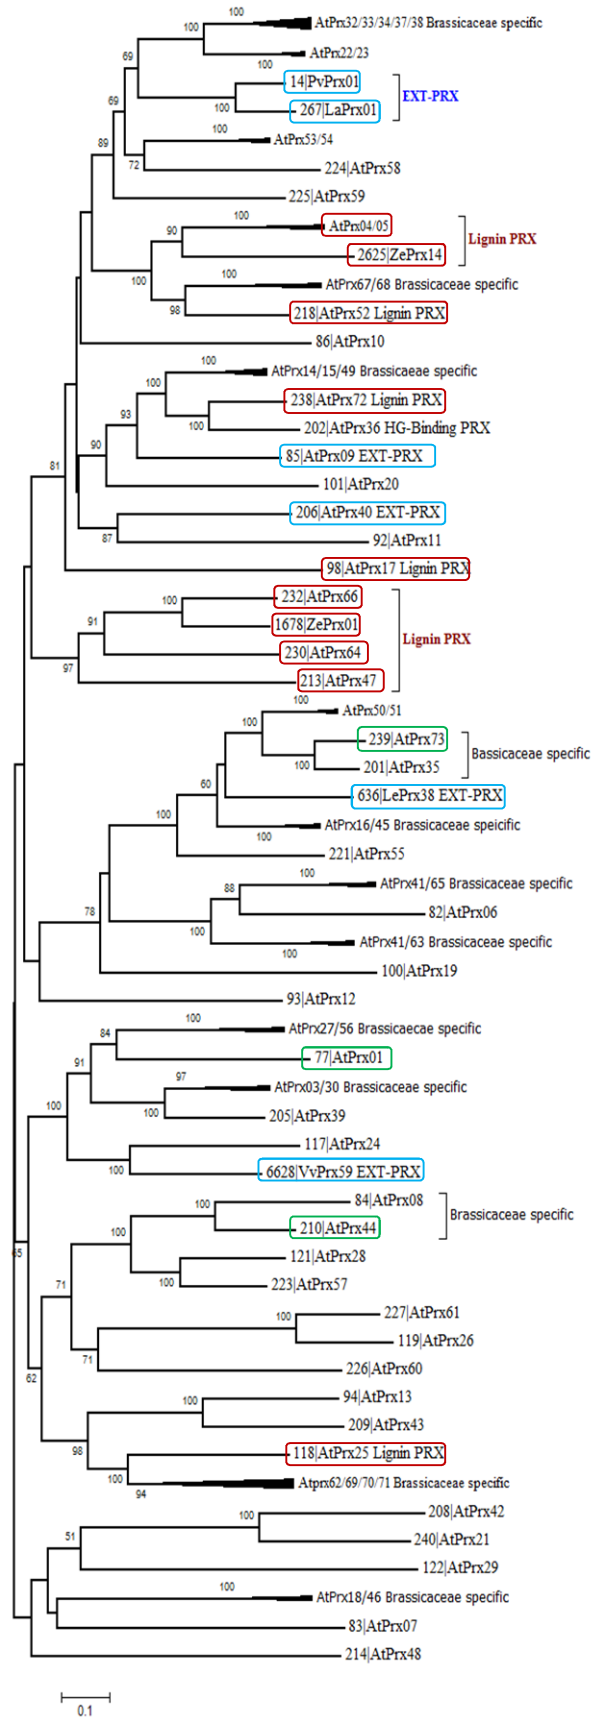

870 **Figure S5. Evolutionary relationships of CIII Prx with putative extensin cross-linking activity.**

871 The 73 Class III Peroxidase protein sequences from *A. thaliana*, two putative Lignin PRX from *Zinnia*  
872 *elegans* and four putative EXT-PRX from *Lupinus album*, *Solanum lycopersicum*, *Phaseolus vulgaris*  
873 and *Vitis vinifera*, have been aligned with ClustalW and the tree constructed using the Neighbor-  
874 Joining method (Saitou and Nei, 1987). The analyses were conducted in MEGA7 (Kumar, 2016). Class  
875 III PRXs with putative EXT-PRX activity or Lignin PRX activity were surrounded in blue and red  
876 respectively. The three Class III PRXs studied in the present work were surrounded in green.  
877 Branches of the tree with sequences resulting from duplication events only detected in Brassicaceae  
878 have collapsed to simplify the tree topology.

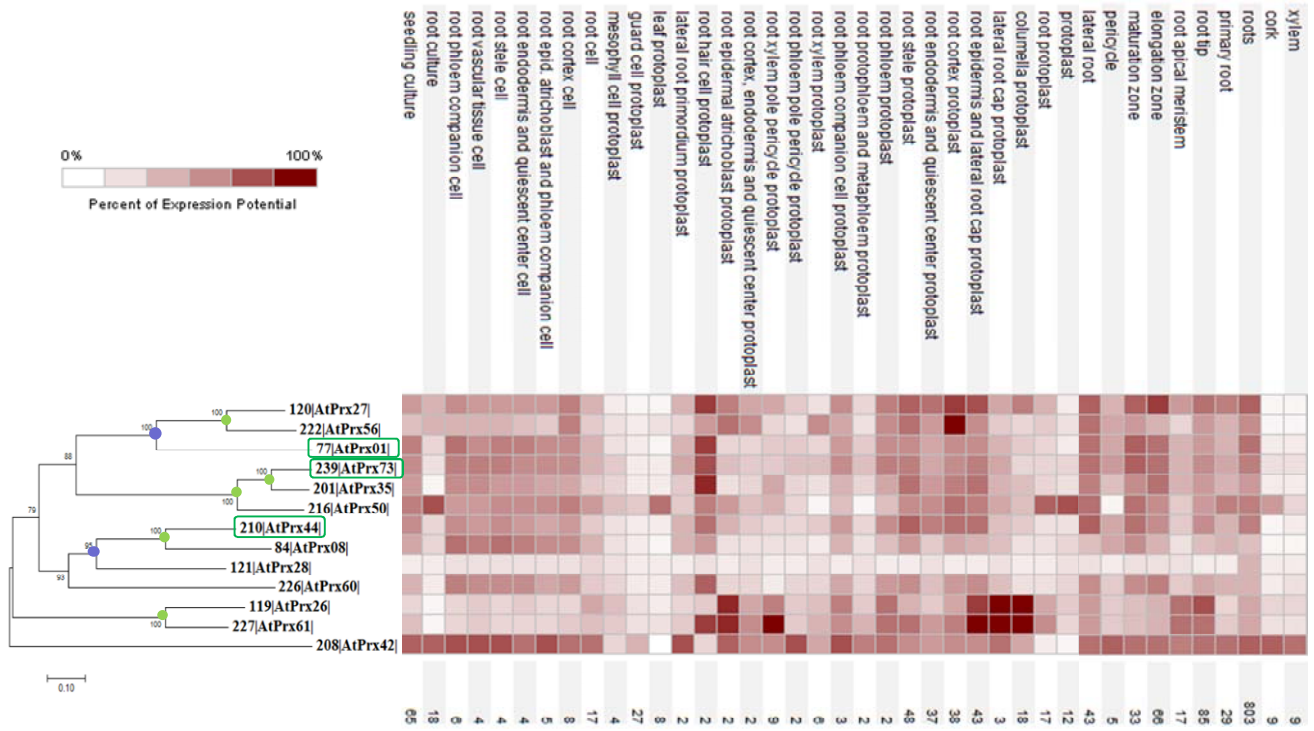

879

880 **Figure S6. Evolutionary and root tissue expression relationships of putative EXT-PRXs in**  
 881 **Arabidopsis.**

882 The evolutionary history of Class III PRXs in root hair associated has been conducted with 15 CIII PRX  
 883 protein sequences of *A. thaliana*. They have been aligned with ClustalW and the tree constructed  
 884 using the Neighbor-Joining method (Saitou and Nei, 1987). The analyses were conducted in MEGA7  
 885 (Kumar, 2016). The sequences of AtPRX01/02 and AtPRX50/51 are either identical or very close,  
 886 leading to only two independent expression profile from Affymetrix data. A brown (max value)-to-  
 887 cream (min value) heatmap was drawn from 105 anatomical parts from data selection available from  
 888 AT\_AFFY\_ATH1-0 and plotted in front of each branch and using Genevestigator. The 3 CIII PRX  
 889 studied in the present work were surrounded in green. Green and blue circles correspond to  
 890 duplication posterior to Brassicaceae and to Dicotyledons emergences respectively. All protein  
 891 sequences are available using their ID number (<http://peroxibase.toulouse.inra.fr>, (Savelli et al.,  
 892 2019). Numbers indicates the amount of dataset available for each tissue.



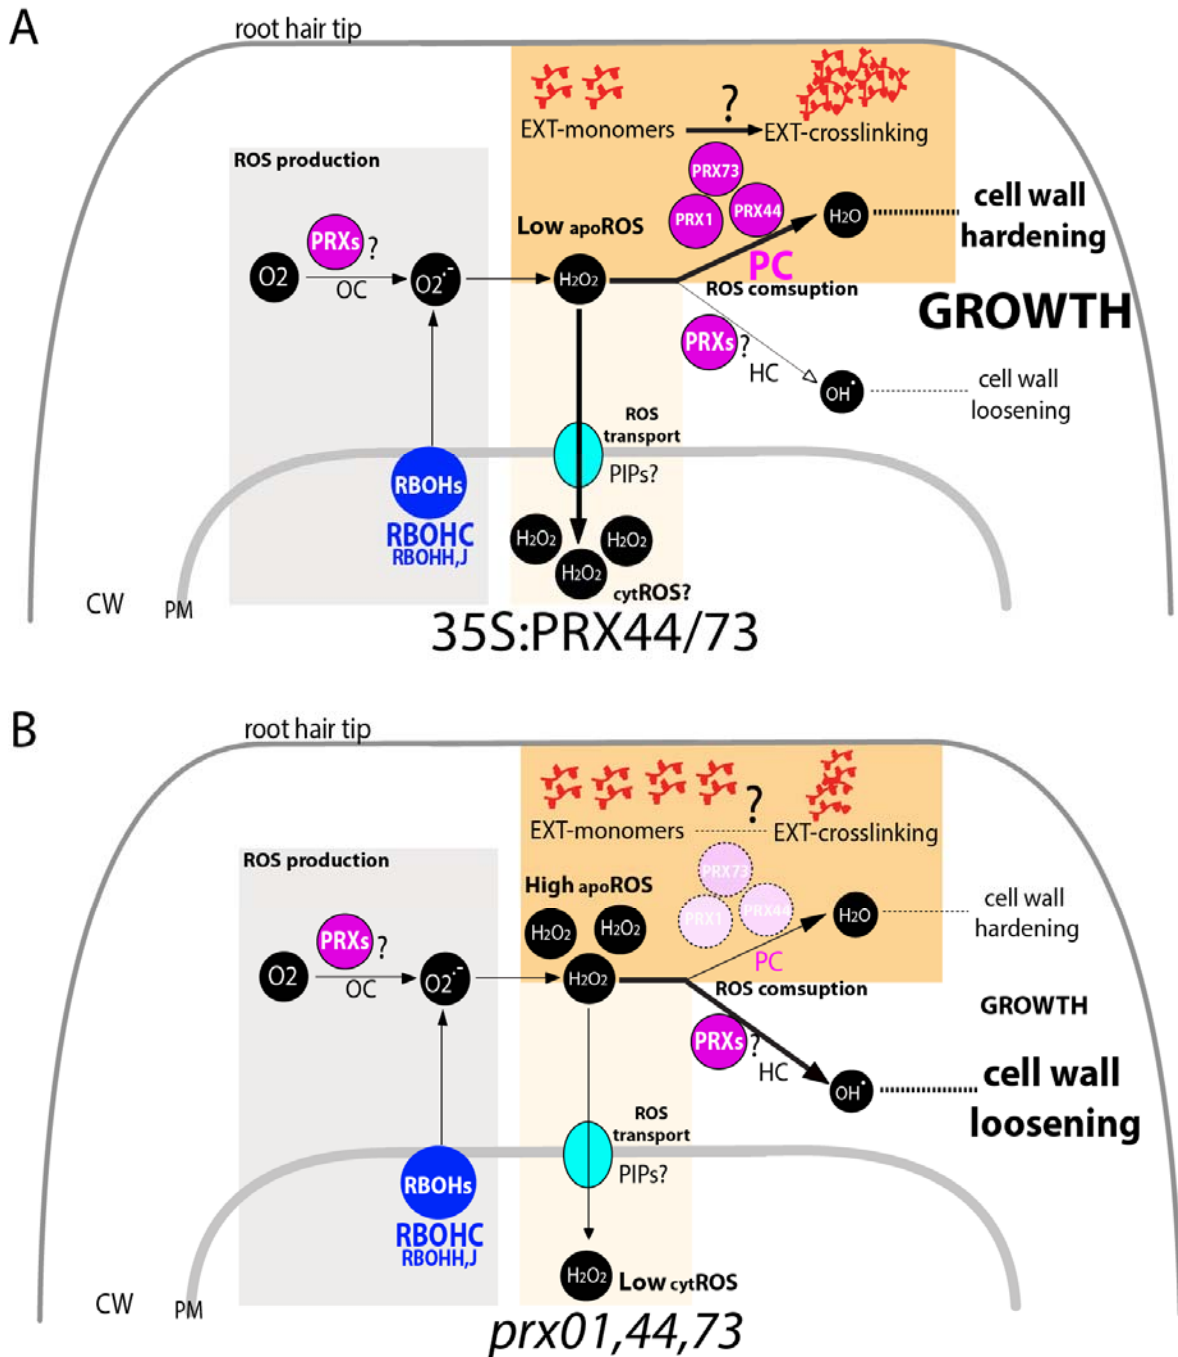

893  
894

895 **Figure S7. Current model of PRX01, PRX44, and PRX73 function linking ROS homeostasis and EXT**  
 896 **crosslinking in the root hair cell walls.** ROS homeostasis in the apoplast includes ROS production,  
 897 ROS consumption, and ROS transport to the cytoplasm. ROS as superoxide ion ( $O_2^-$ ) is primarily  
 898 produced by RBOHC and by RBOHH,J [based on Mangano et al. (2017)] and, possibly, by unknown  
 899 PRXs in the root hair tip, and then dismutated to hydrogen peroxide ( $H_2O_2$ ). (A) It is proposed that  
 900 high levels of PRX44 or PRX73 during the peroxidative cycle (PC) (as found in 35S:PRX44-GFP and  
 901 35S:PRX73-GFP lines) might trigger a high consumption of apoplastic  $H_2O_2$  (low apoROS) with a

902 concomitant cell wall hardening. **(B)** Under low levels of all three PRXs (as found in the triple mutant  
903 *prx01,44,73*), most of the H<sub>2</sub>O<sub>2</sub> produced accumulates in the apoplast (high <sub>apo</sub>ROS) triggering a  
904 cessation of cell expansion. A portion of apoplastic H<sub>2</sub>O<sub>2</sub> might be transported into the cytoplasm by  
905 aquaporins (PIPs). The balance between cell wall hardening and cell wall loosening processes might  
906 be compromised, affecting polar root hair growth. CW = cell wall; PM = plasma membrane; HC =  
907 hydroxylic cycle; OC = oxidative cycle. PIP= Plasma membrane Intrinsic Proteins (aquaporins).

908 **SUPPLEMENTARY REFERENCES**

- 909 Kumar, S., Stecher G., Tamura K. (2016) MEGA7: molecular evolutionaary genetic analysis version  
910 7.0 for bigger datasets. *Mol. Biol. Evol.* 33(7): 1870-1874.
- 911 Mangano S. *et al.* (2017). The molecular link between auxin and ROS-controlled root hair growth.  
912 *Proc. Natl. Acad. Sci. U.S.A.* 114(20):5289-5294.
- 913 Marzol E, Borassi C, Bringas M, Sede A, Rodríguez Garcia DR, Capece L, Estevez JM. (2018). Filling the  
914 Gaps to Solve the Extensin Puzzle. *Mol Plant.* 11(5):645-658.
- 915 Mutwil, M., Klie, S., Tohge, T., Giorgi, F.M., Wilkins, O., Campbell, M.M., Fernie, A.R., Usadel, B.,  
916 Nikoloski, Z. and Persson, S. (2011). PlaNet: combined sequence and expression comparisons  
917 across plant networks derived from seven species. *Plant Cell*, 23, 895– 910.
- 918 Saitou N, Nei M. (1987). The neighbor-joining method: a newmethod for reconstruction of  
919 phylogenetic trees. *Mol Biol Evol*4:406–25.
- 920 Savelli B., Li Q., Webber M., Jemmat A.M., Robitaille A., Zamocky M., Mathe C., Dunand C. (2019).  
921 RedoxiBase a database for ROS homeostasis regulated proteins. *Redox Biol.*  
922 doi.org/10.1016/j.redox.2019.101247.
